# Supplementary material for: A systematic investigation of the NMR relaxation properties of Fe(iii)-EDTA derivatives and their potential as MRI contrast agents
Source: Royal Society of Chemistry journal article supplement (doi:10.1039/d2qi02665a), 2023-01-01
Supplement: d2qi02665a1.pdf [file d2qi02665a1.pdf]

## **A Systematic Investigation of the Relaxation Properties of Fe(III)-EDTA Derivatives and Their Potential as MRI Contrast Agents**

Rocío Uzal-Varela,<sup>†</sup> Fátima Lucio-Martínez,<sup>†</sup> Alessandro Nucera,<sup>‡</sup> Mauro Botta,<sup>\*,‡</sup> David Esteban-Gómez,<sup>†</sup> Laura Valencia,<sup>§</sup> Aurora Rodríguez-Rodríguez,<sup>\*,†</sup> and Carlos Platas-Iglesias<sup>†</sup>

<sup>†</sup> Universidade da Coruña, Centro de Investigacións Científicas Avanzadas (CICA) and Departamento de Química, Facultade de Ciencias, 15071, A Coruña, Galicia, Spain

<sup>‡</sup> Dipartimento di Scienze e Innovazione Tecnologica, Università del Piemonte Orientale "A. Avogadro", Viale T. Michel 11, 15121 Alessandria, Italy.

<sup>§</sup> Departamento de Química Inorgánica, Universidade de Vigo, Facultad de Ciencias, 36310 Pontevedra, Spain

|                                                                                                                                                                                                                                                                                                                                              |    |
|----------------------------------------------------------------------------------------------------------------------------------------------------------------------------------------------------------------------------------------------------------------------------------------------------------------------------------------------|----|
| <b>Scheme S1:</b> Synthesis of <b>1,2-H<sub>4</sub>CpDTA</b> .....                                                                                                                                                                                                                                                                           | 4  |
| <b>Figure S1:</b> <sup>1</sup> H NMR spectrum of compound <b>1</b> (300 MHz, CDCl <sub>3</sub> , 298 K). .....                                                                                                                                                                                                                               | 4  |
| <b>Figure S2:</b> <sup>13</sup> C NMR spectrum of compound <b>1</b> (75 MHz, CDCl <sub>3</sub> , 298 K). .....                                                                                                                                                                                                                               | 4  |
| <b>Figure S3:</b> Experimental high resolution mass spectrum (ESI <sup>+</sup> ) of compound <b>1</b> . .....                                                                                                                                                                                                                                | 5  |
| <b>Figure S4:</b> <sup>1</sup> H NMR spectrum of <b>1,2-H<sub>4</sub>CpDTA</b> (300 MHz, D <sub>2</sub> O, 298 K, pH 14). .....                                                                                                                                                                                                              | 5  |
| <b>Figure S5:</b> <sup>13</sup> C NMR spectrum of <b>1,2-H<sub>4</sub>CpDTA</b> (75 MHz, D <sub>2</sub> O, 298 K, pH 14). .....                                                                                                                                                                                                              | 6  |
| <b>Figure S6:</b> Experimental high resolution mass spectrum (ESI <sup>+</sup> ) of <b>1,2-H<sub>4</sub>CpDTA</b> . .....                                                                                                                                                                                                                    | 6  |
| <b>Scheme S2:</b> Synthesis of <b>1,2-c-H<sub>4</sub>CDTA</b> . .....                                                                                                                                                                                                                                                                        | 7  |
| <b>Figure S7:</b> <sup>1</sup> H NMR spectrum of compound <b>2</b> (300 MHz, CDCl <sub>3</sub> , 298 K). *Solvent residues .....                                                                                                                                                                                                             | 7  |
| <b>Figure S8:</b> <sup>13</sup> C NMR spectrum of compound <b>2</b> (75 MHz, CDCl <sub>3</sub> , 298 K). .....                                                                                                                                                                                                                               | 7  |
| <b>Figure S9:</b> Experimental high resolution mass spectrum (ESI <sup>+</sup> ) of compound <b>2</b> . .....                                                                                                                                                                                                                                | 8  |
| <b>Figure S10:</b> <sup>1</sup> H NMR spectrum of <b>1,2-c-H<sub>4</sub>CDTA</b> (300 MHz, D <sub>2</sub> O, 298 K, pH 1). .....                                                                                                                                                                                                             | 8  |
| <b>Figure S11:</b> <sup>13</sup> C NMR spectrum of <b>1,2-c-H<sub>4</sub>CDTA</b> (75 MHz, D <sub>2</sub> O, 298 K, pH 1). .....                                                                                                                                                                                                             | 9  |
| <b>Figure S12:</b> Experimental high resolution mass spectrum (ESI <sup>+</sup> ) of <b>1,2-c-H<sub>4</sub>CDTA</b> . .....                                                                                                                                                                                                                  | 9  |
| <b>Scheme S3:</b> Synthesis of <b>H<sub>2</sub>CBuDEDPA</b> . .....                                                                                                                                                                                                                                                                          | 10 |
| <b>Figure S13:</b> <sup>1</sup> H NMR spectrum of <b>H<sub>2</sub>CBuDEDPA</b> (400 MHz, D <sub>2</sub> O, pH 2, 298 K). .....                                                                                                                                                                                                               | 10 |
| <b>Figure S14:</b> <sup>13</sup> C NMR spectrum of <b>H<sub>2</sub>CBuDEDPA</b> (400 MHz, D <sub>2</sub> O, pH 2, 298 K). .....                                                                                                                                                                                                              | 10 |
| <b>Figure S15:</b> Experimental high resolution mass spectrum (ESI <sup>+</sup> ) of <b>H<sub>2</sub>CBuDEDPA</b> . .....                                                                                                                                                                                                                    | 11 |
| <b>Figure S16:</b> Experimental high resolution mass spectrum (ESI <sup>+</sup> ) of <b>[Fe(EDTA)]<sup>-</sup></b> .....                                                                                                                                                                                                                     | 11 |
| <b>Figure S17:</b> Experimental high resolution mass spectrum (ESI <sup>+</sup> ) of <b>[Fe(<i>t</i>-CDTA)]<sup>-</sup></b> .....                                                                                                                                                                                                            | 12 |
| <b>Figure S 18:</b> Experimental high resolution mass spectrum (ESI <sup>+</sup> ) of <b>[Fe(<i>c</i>-CDTA)]<sup>-</sup></b> .....                                                                                                                                                                                                           | 12 |
| <b>Figure S 19:</b> Experimental high resolution mass spectrum (ESI <sup>+</sup> ) of <b>[Fe(CpDTA)]<sup>-</sup></b> .....                                                                                                                                                                                                                   | 13 |
| <b>Figure S 20:</b> Experimental high resolution mass spectrum (ESI <sup>+</sup> ) of <b>[Fe(PhDTA)]<sup>-</sup></b> .....                                                                                                                                                                                                                   | 13 |
| <b>Figure S21:</b> Experimental high resolution mass spectrum (ESI <sup>+</sup> ) of <b>[Fe(PDTA)]<sup>-</sup></b> .....                                                                                                                                                                                                                     | 14 |
| <b>Figure S22:</b> Experimental high resolution mass spectrum (ESI <sup>+</sup> ) of <b>[Fe(CBuDTA)]<sup>-</sup></b> .....                                                                                                                                                                                                                   | 14 |
| <b>Figure S23:</b> Experimental high resolution mass spectrum (ESI <sup>+</sup> ) of <b>[Fe(CBuDEDPA)]<sup>+</sup></b> .....                                                                                                                                                                                                                 | 15 |
| <b>Table S1:</b> Crystal Data and Structure Refinement Details. Parameter <b>[Fe(CBuDEDPA)](PF<sub>6</sub>)</b> . .....                                                                                                                                                                                                                      | 15 |
| <b>Figure S24:</b> Cyclic voltammogram of <b>[Fe(EDTA)]<sup>-</sup></b> complex in aqueous solution in 0.15 M NaCl (2.6 mM, pH= 5.5), recorded at 10, 50, 100, 250, and 500 mV·s <sup>-1</sup> (top); and plots of the linear dependence of anodic and cathodic peak currents with the square root of the scan rate (bottom). .....          | 16 |
| <b>Figure S25:</b> Cyclic voltammogram of <b>[Fe(<i>t</i>-CDTA)]<sup>-</sup></b> complex in aqueous solution in 0.15 M NaCl (2.6 mM, pH= 5.3), recorded at 10, 50, 100, 250, and 500 mV·s <sup>-1</sup> (top); and plots of the linear dependence of anodic and cathodic peak currents with the square root of the scan rate (bottom). ..... | 17 |
| <b>Figure S26:</b> Cyclic voltammogram of <b>[Fe(<i>c</i>-CDTA)]<sup>-</sup></b> complex in aqueous solution in 0.15 M NaCl (2.0 mM, pH= 6.8), recorded at 10, 50, 100, 250, and 500 mV·s <sup>-1</sup> (top); and plots of the linear dependence of anodic and cathodic peak currents with the square root of the scan rate (bottom). ..... | 18 |
| <b>Figure S27:</b> Cyclic voltammogram of <b>[Fe(CpDTA)]<sup>-</sup></b> complex in aqueous solution in 0.15 M NaCl (2.0 mM, pH= 5.7), recorded at 10, 50, 100, 250, and 500 mV·s <sup>-1</sup> (top); and plots of the linear dependence of anodic and cathodic peak currents with the square root of the scan rate (bottom). .....         | 19 |
| <b>Figure S28:</b> Cyclic voltammogram of <b>[Fe(PhDTA)]<sup>-</sup></b> complex in aqueous solution in 0.15 M NaCl (2 mM, pH= 5.6), recorded at 10, 50, 100, 250, and 500 mV·s <sup>-1</sup> (top); and plots of the linear dependence of anodic and cathodic peak currents with the square root of the scan rate (bottom). .....           | 20 |

|                                                                                                                                                                                                                                                                                                                                                   |    |
|---------------------------------------------------------------------------------------------------------------------------------------------------------------------------------------------------------------------------------------------------------------------------------------------------------------------------------------------------|----|
| <b>Figure S29:</b> Cyclic voltammogram of $[\text{Fe}(\text{PDTA})]^-$ complex in aqueous solution in 0.15 M NaCl (3.0 mM, pH= 5.9), recorded at 10, 50, 100, 250, and 500 $\text{mV}\cdot\text{s}^{-1}$ (top); and plots of the linear dependence of anodic and cathodic peak currents with the square root of the scan rate (bottom). .....     | 21 |
| <b>Figure S30:</b> Cyclic voltammogram of $[\text{Fe}(\text{CBuDTA})]^-$ complex in aqueous solution in 0.15 M NaCl (2.3 mM, pH= 5.7), recorded at 10, 50, 100, 250, and 500 $\text{mV}\cdot\text{s}^{-1}$ (top); and plots of the linear dependence of anodic and cathodic peak currents with the square root of the scan rate (bottom). .....   | 22 |
| <b>Figure S31:</b> Cyclic voltammogram of $[\text{Fe}(\text{CBuDEDPA})]^+$ complex in aqueous solution in 0.15 M NaCl (1.5 mM, pH= 5.1), recorded at 10, 50, 100, 250, and 500 $\text{mV}\cdot\text{s}^{-1}$ (top); and plots of the linear dependence of anodic and cathodic peak currents with the square root of the scan rate (bottom). ..... | 23 |
| <b>Figure S32:</b> Speciation diagram calculated for the $\text{Fe}(\text{III})\text{-PDTA}^{4-}$ using the equilibrium data reported in the literature. <sup>1</sup> .....                                                                                                                                                                       | 24 |
| <b>Table S2:</b> Optimized Cartesian coordinates ( $\text{\AA}$ ) of the $[\text{Fe}(\text{EDTA})(\delta)(\text{H}_2\text{O})]^- \cdot 5\text{H}_2\text{O}$ system obtained with DFT calculations (0 Imaginary Frequencies). .....                                                                                                                | 24 |
| <b>Table S3:</b> Optimized Cartesian coordinates ( $\text{\AA}$ ) of the $[\text{Fe}(\text{EDTA})(\lambda)(\text{H}_2\text{O})]^- \cdot 5\text{H}_2\text{O}$ system obtained with DFT calculations (0 Imaginary Frequencies). .....                                                                                                               | 25 |
| <b>Table S4:</b> Optimized Cartesian coordinates ( $\text{\AA}$ ) of the $[\text{Fe}(t\text{-CDTA})(\delta)(\text{H}_2\text{O})]^- \cdot 5\text{H}_2\text{O}$ system obtained with DFT calculations (0 Imaginary Frequencies). .....                                                                                                              | 26 |
| <b>Table S5:</b> Optimized Cartesian coordinates ( $\text{\AA}$ ) of the $[\text{Fe}(t\text{-CDTA})(\lambda)(\text{H}_2\text{O})]^- \cdot 5\text{H}_2\text{O}$ system obtained with DFT calculations (0 Imaginary Frequencies). .....                                                                                                             | 27 |
| <b>Table S6:</b> Optimized Cartesian coordinates ( $\text{\AA}$ ) of the $[\text{Fe}(c\text{-CDTA})(\delta)(\text{H}_2\text{O})]^- \cdot 5\text{H}_2\text{O}$ system obtained with DFT calculations (0 Imaginary Frequencies). .....                                                                                                              | 28 |
| <b>Table S7:</b> Optimized Cartesian coordinates ( $\text{\AA}$ ) of the $[\text{Fe}(c\text{-CDTA})(\lambda)(\text{H}_2\text{O})]^- \cdot 5\text{H}_2\text{O}$ system obtained with DFT calculations (0 Imaginary Frequencies). .....                                                                                                             | 30 |
| <b>Table S8:</b> Optimized Cartesian coordinates ( $\text{\AA}$ ) of the $[\text{Fe}(\text{CpDTA})(\delta)(\text{H}_2\text{O})]^- \cdot 5\text{H}_2\text{O}$ system obtained with DFT calculations (0 Imaginary Frequencies). .....                                                                                                               | 31 |
| <b>Table S9:</b> Optimized Cartesian coordinates ( $\text{\AA}$ ) of the $[\text{Fe}(\text{CpDTA})(\lambda)(\text{H}_2\text{O})]^- \cdot 5\text{H}_2\text{O}$ system obtained with DFT calculations (0 Imaginary Frequencies). .....                                                                                                              | 32 |
| <b>Table S10:</b> Optimized Cartesian coordinates ( $\text{\AA}$ ) of the $[\text{Fe}(\text{PhDTA})(\text{H}_2\text{O})]^- \cdot 5\text{H}_2\text{O}$ system obtained with DFT calculations (0 Imaginary Frequencies). .....                                                                                                                      | 33 |
| <b>Table S11:</b> Optimized Cartesian coordinates ( $\text{\AA}$ ) of the $[\text{Fe}(\text{CBuDTA})(\text{H}_2\text{O})]^- \cdot 5\text{H}_2\text{O}$ system obtained with DFT calculations (0 Imaginary Frequencies). .....                                                                                                                     | 34 |
| <b>References</b> .....                                                                                                                                                                                                                                                                                                                           | 35 |



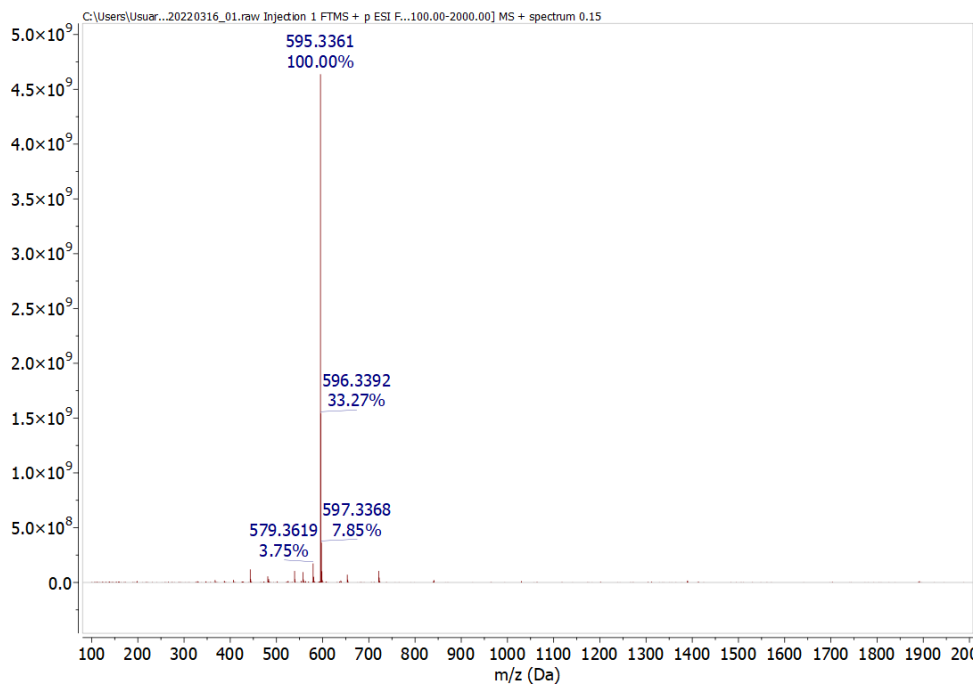

**Figure S3:** Experimental high resolution mass spectrum (ESI<sup>+</sup>) of compound 1.

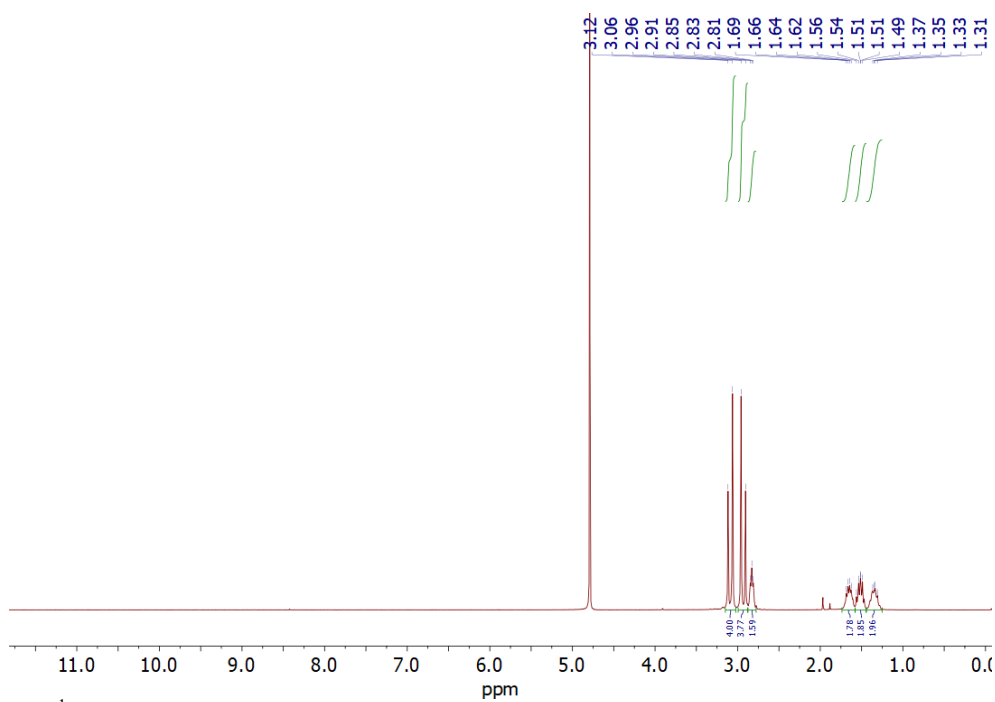

**Figure S4:** <sup>1</sup>H NMR spectrum of 1,2-H<sub>4</sub>CpDTA (300 MHz, D<sub>2</sub>O, 298 K, pH 14).

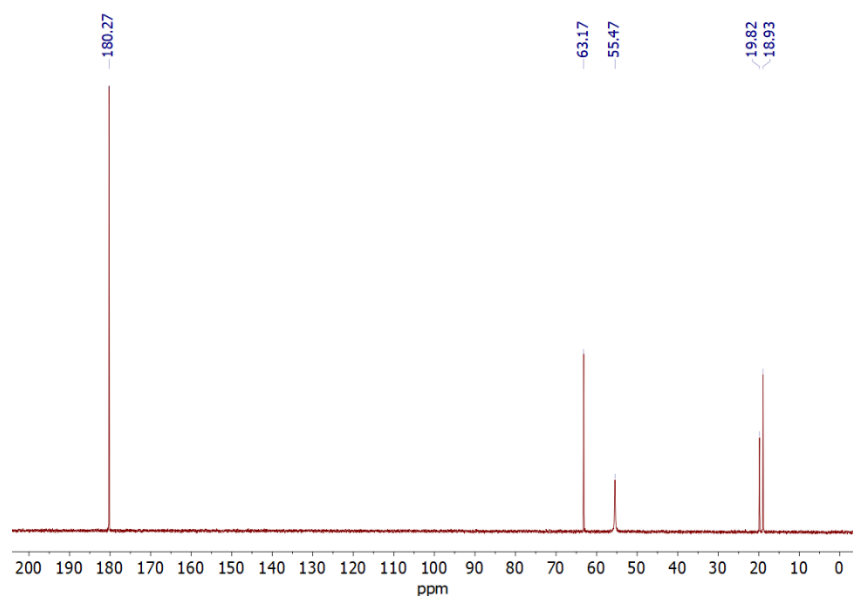

**Figure S5:**  $^{13}\text{C}$  NMR spectrum of **1,2-H<sub>4</sub>CpDTA** (75 MHz, D<sub>2</sub>O, 298 K, pH 14).

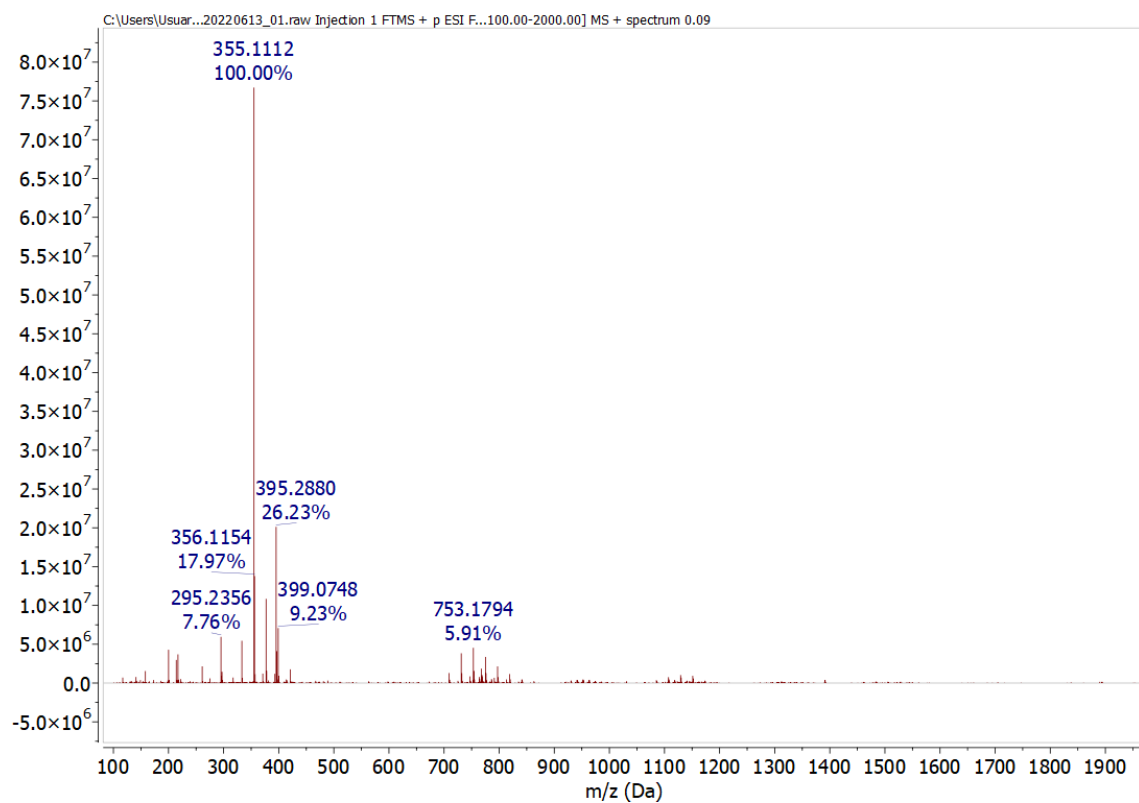

**Figure S6:** Experimental high resolution mass spectrum (ESI<sup>+</sup>) of **1,2-H<sub>4</sub>CpDTA**.

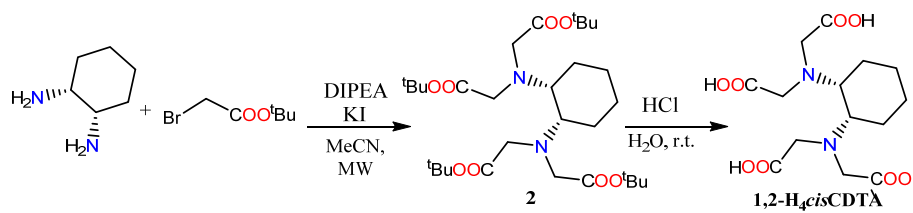

**Scheme S2:** Synthesis of 1,2-*c*-H<sub>4</sub>CDTA.

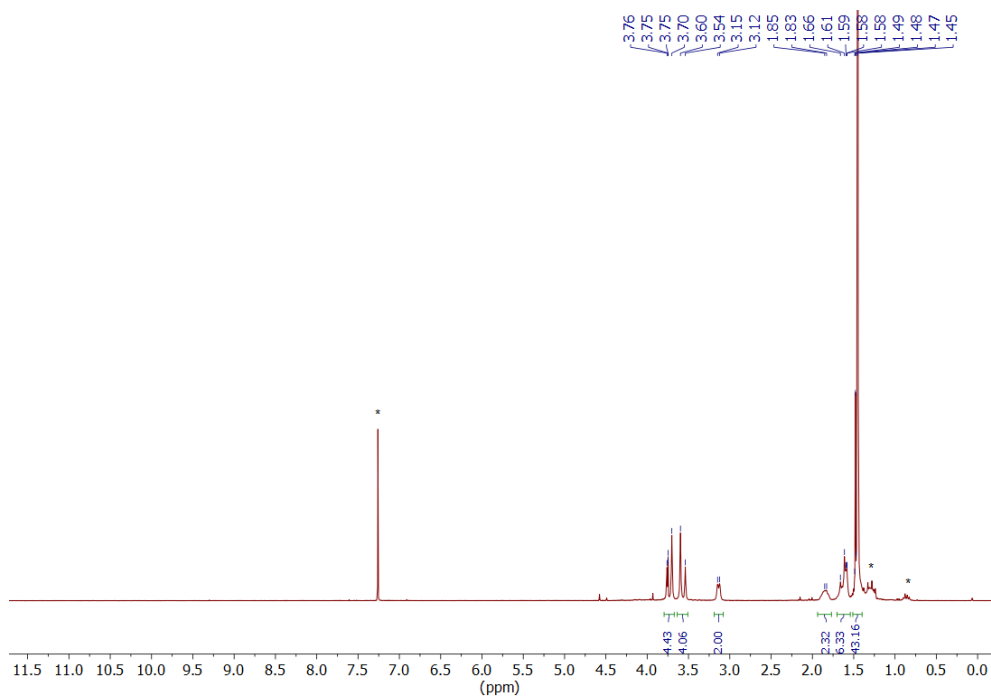

**Figure S7:** <sup>1</sup>H NMR spectrum of compound **2** (300 MHz, CDCl<sub>3</sub>, 298 K). \*Solvent residues

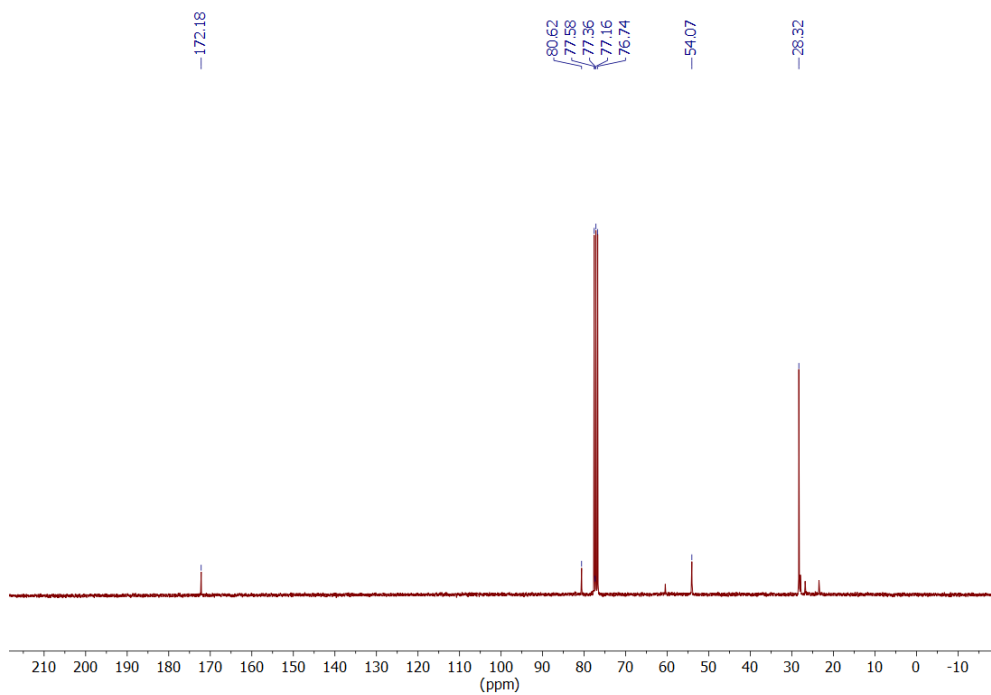

**Figure S8:** <sup>13</sup>C NMR spectrum of compound **2** (75 MHz, CDCl<sub>3</sub>, 298 K).

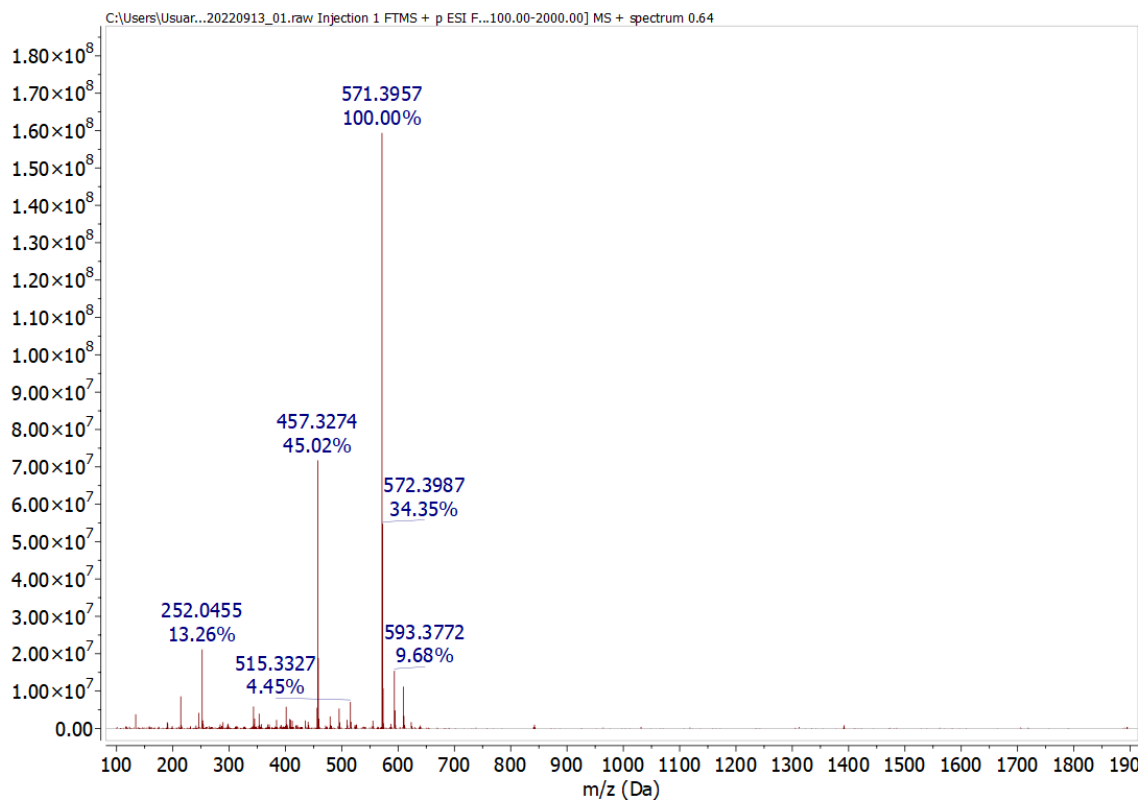

**Figure S9:** Experimental high resolution mass spectrum (ESI<sup>+</sup>) of compound **2**.

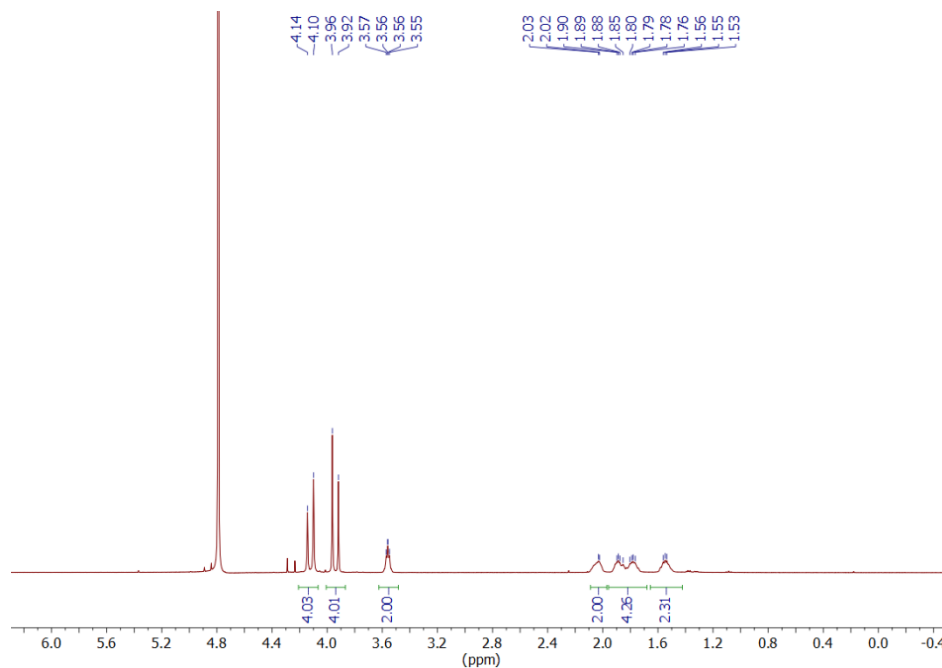

**Figure S10:** <sup>1</sup>H NMR spectrum of **1,2-c-H<sub>4</sub>CDTA** (300 MHz, D<sub>2</sub>O, 298 K, pH 1).



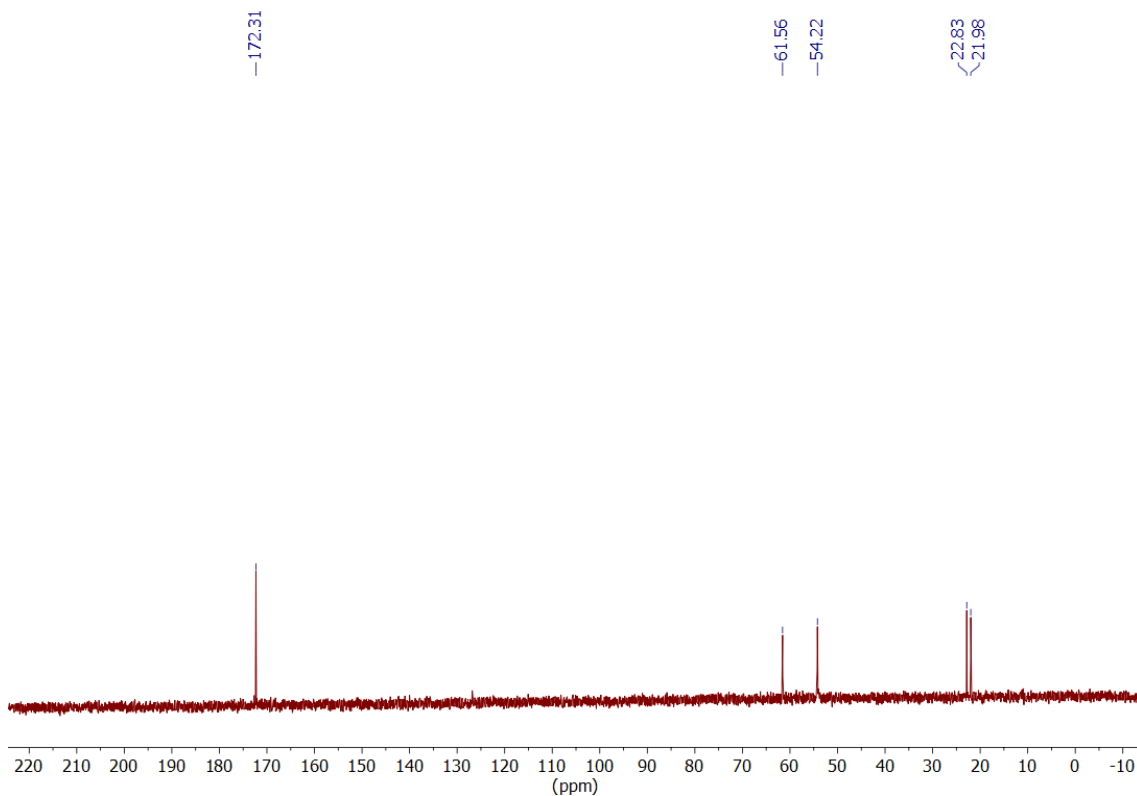

Figure S11:  $^{13}\text{C}$  NMR spectrum of 1,2-*c*- $\text{H}_4\text{CDTA}$  (75 MHz,  $\text{D}_2\text{O}$ , 298 K, pH 1).

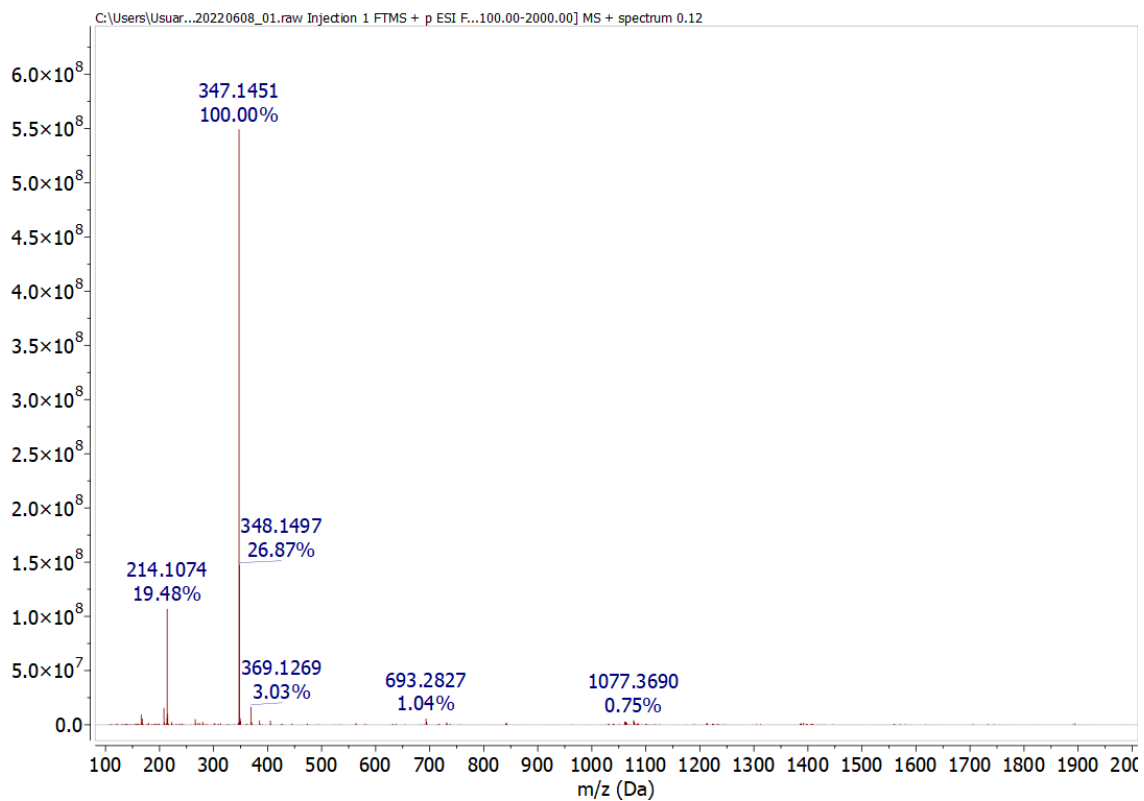

Figure S12: Experimental high resolution mass spectrum ( $\text{ESI}^+$ ) of 1,2-*c*- $\text{H}_4\text{CDTA}$ .

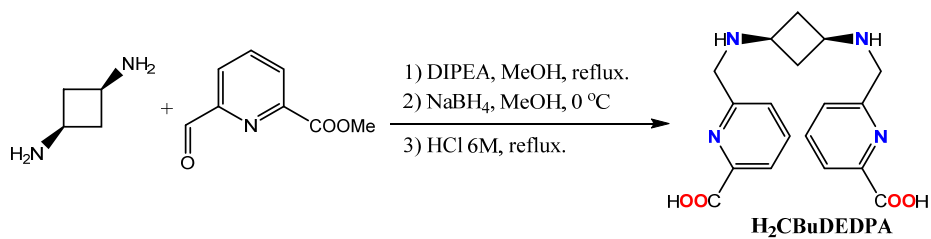

**Scheme S3:** Synthesis of H<sub>2</sub>CBuDEDPA.

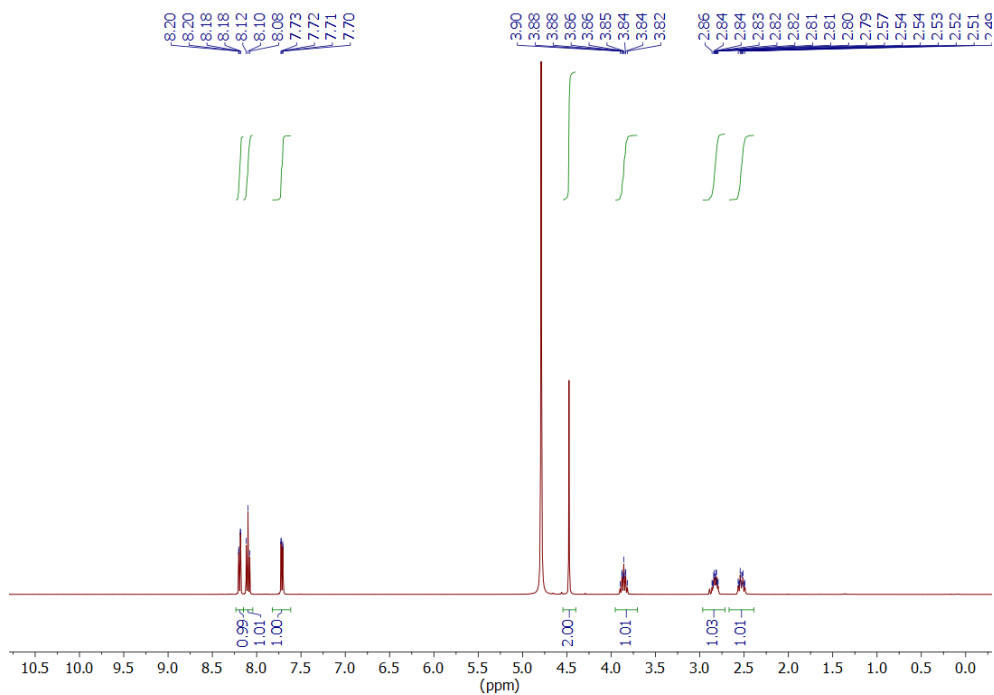

**Figure S13:** <sup>1</sup>H NMR spectrum of H<sub>2</sub>CBuDEDPA (400 MHz, D<sub>2</sub>O, pH 2, 298 K).

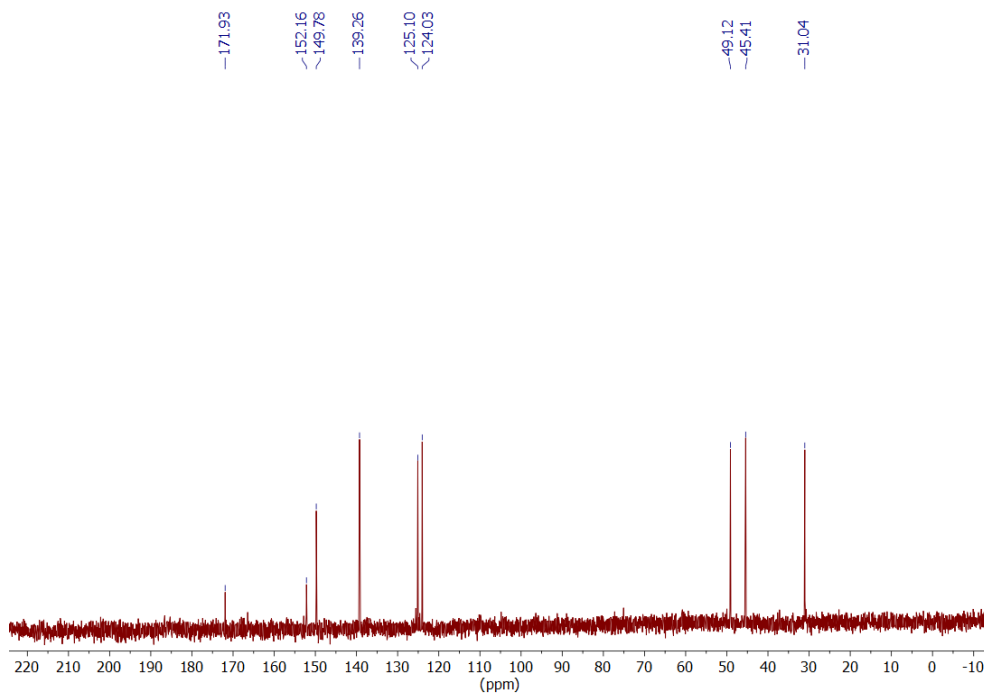

**Figure S14:** <sup>13</sup>C NMR spectrum of H<sub>2</sub>CBuDEDPA (400 MHz, D<sub>2</sub>O, pH 2, 298 K).

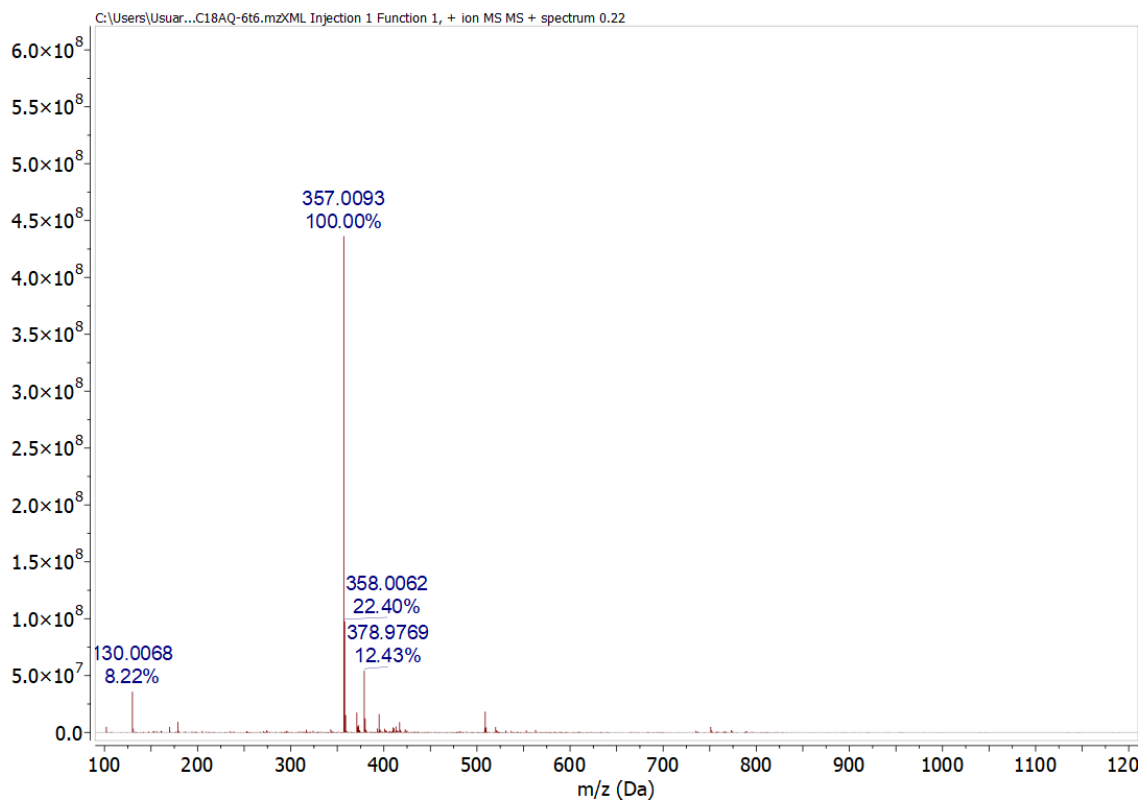

**Figure S15:** Experimental high resolution mass spectrum (ESI<sup>+</sup>) of H<sub>2</sub>CBuDEDPA.

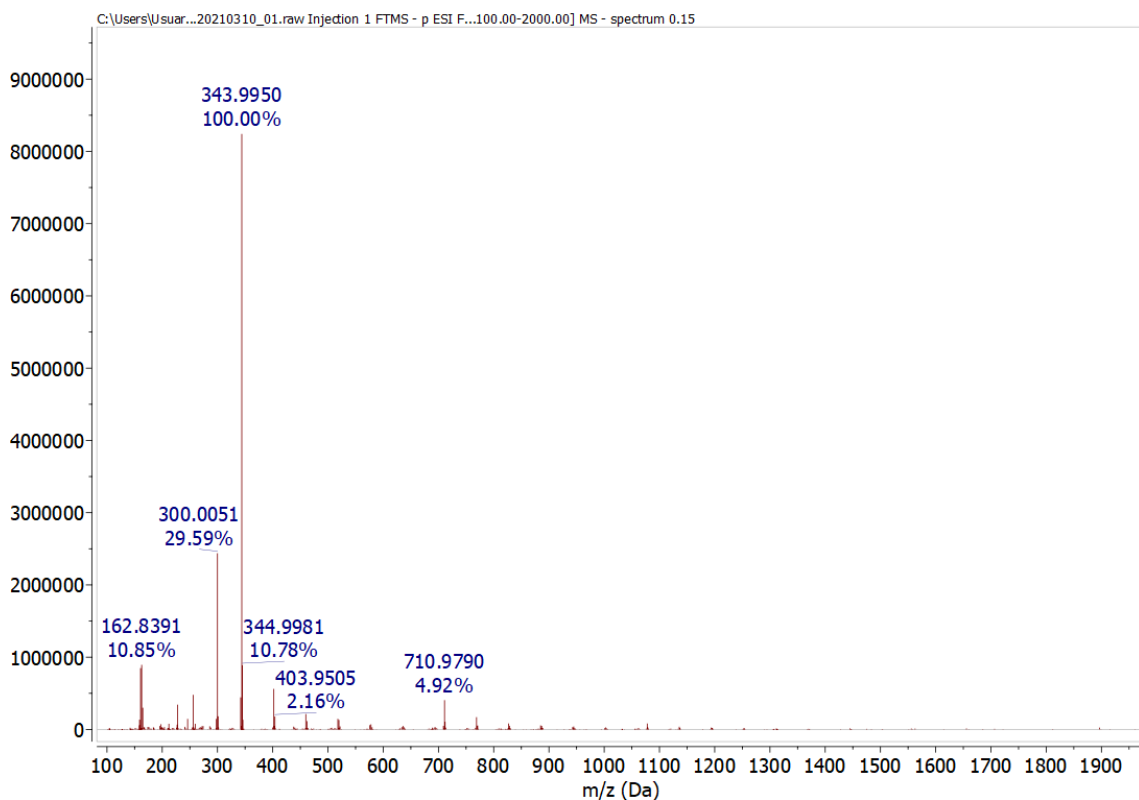

**Figure S16:** Experimental high resolution mass spectrum (ESI<sup>+</sup>) of [Fe(EDTA)]<sup>-</sup>.

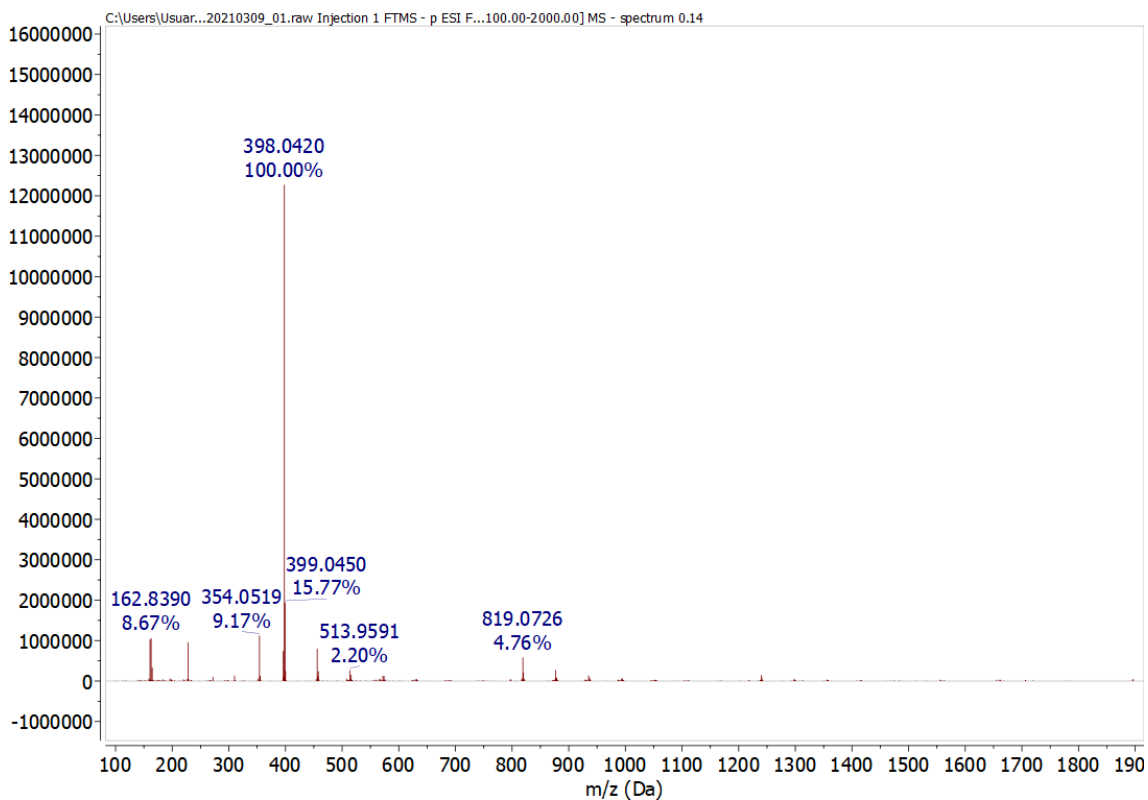

**Figure S17:** Experimental high resolution mass spectrum (ESI<sup>+</sup>) of [Fe(*t*-CDTA)]<sup>-</sup>.

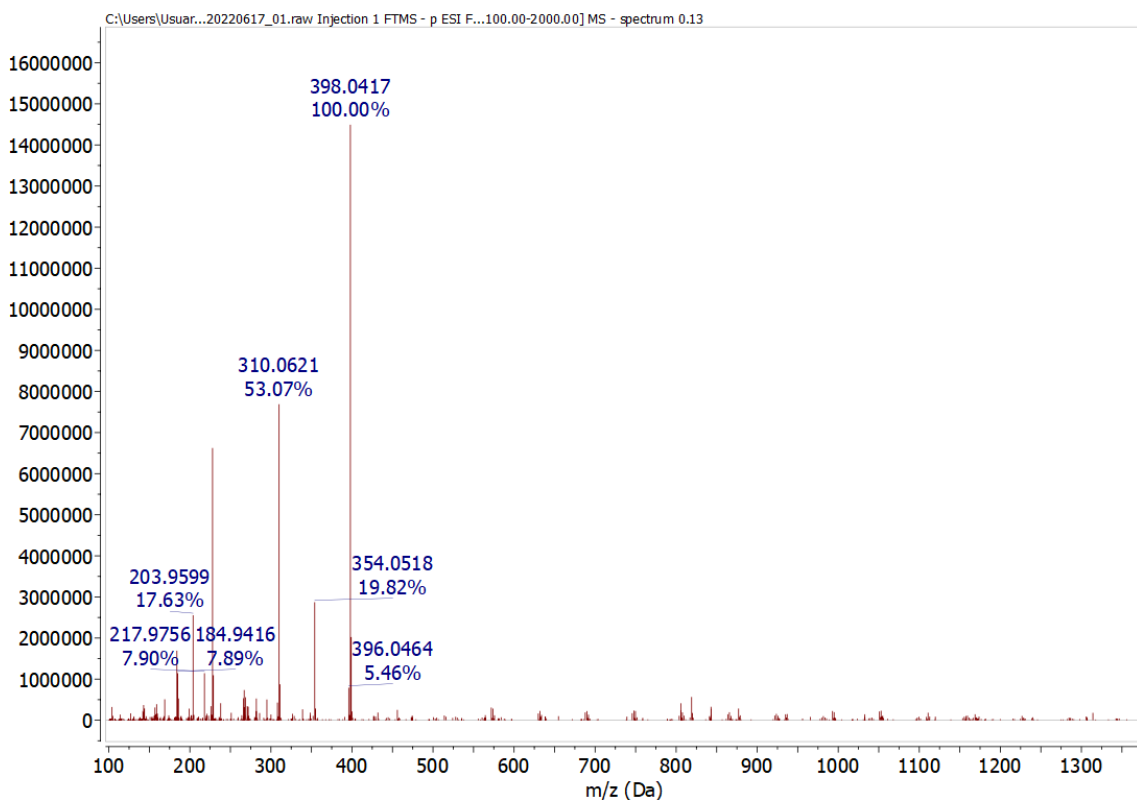

**Figure S 18:** Experimental high resolution mass spectrum (ESI<sup>+</sup>) of [Fe(*c*-CDTA)]<sup>-</sup>.

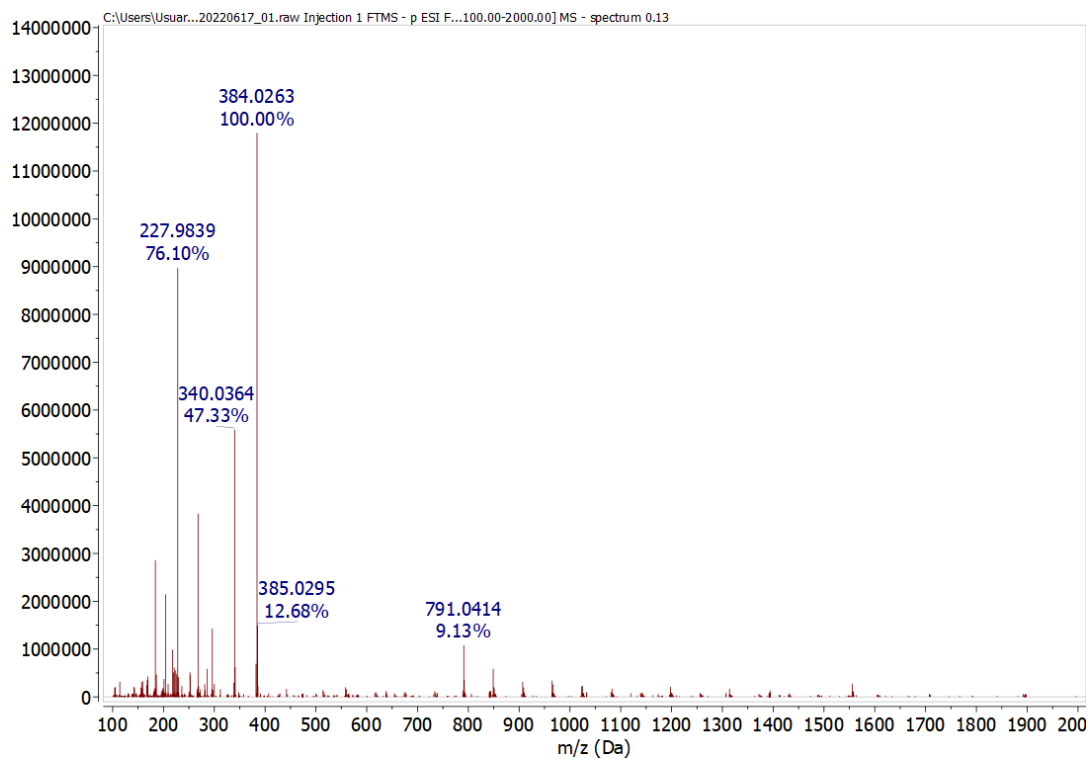

**Figure S 19:** Experimental high resolution mass spectrum (ESI<sup>+</sup>) of [Fe(CpDTA)]<sup>-</sup>.

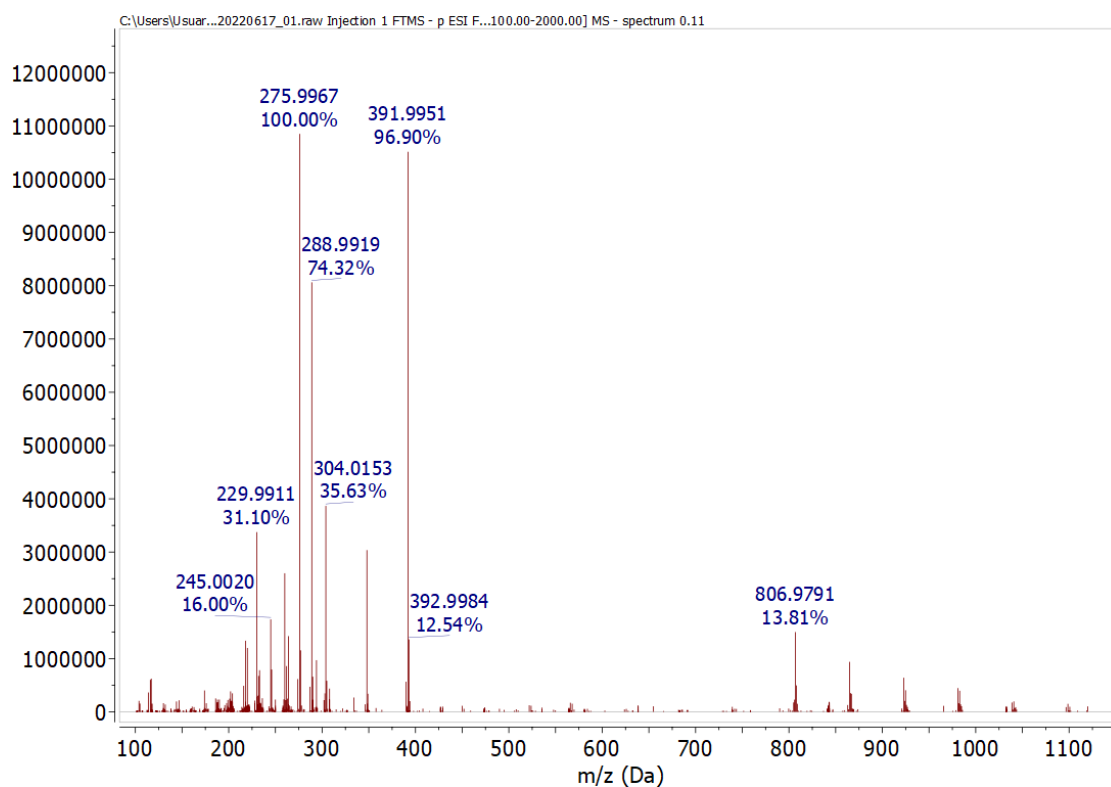

**Figure S 20:** Experimental high resolution mass spectrum (ESI<sup>+</sup>) of [Fe(PhDTA)]<sup>-</sup>.

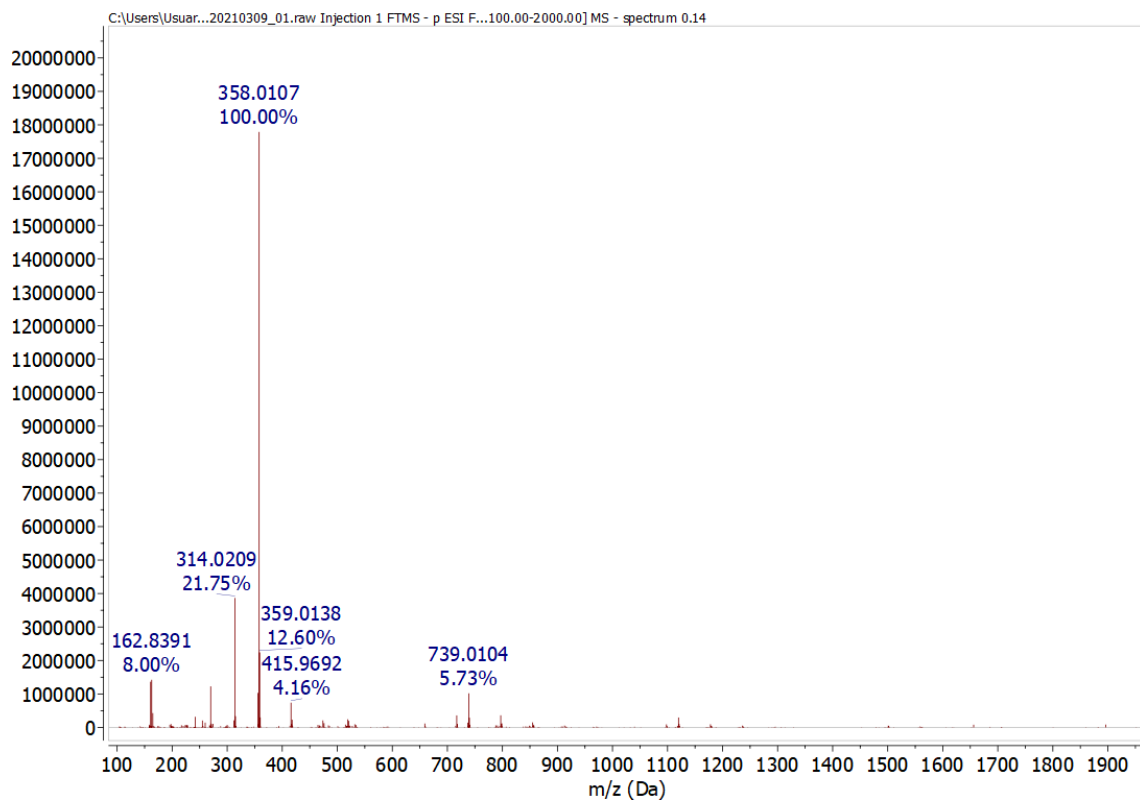

**Figure S21:** Experimental high resolution mass spectrum (ESI<sup>+</sup>) of [Fe(PDTA)]<sup>-</sup>.

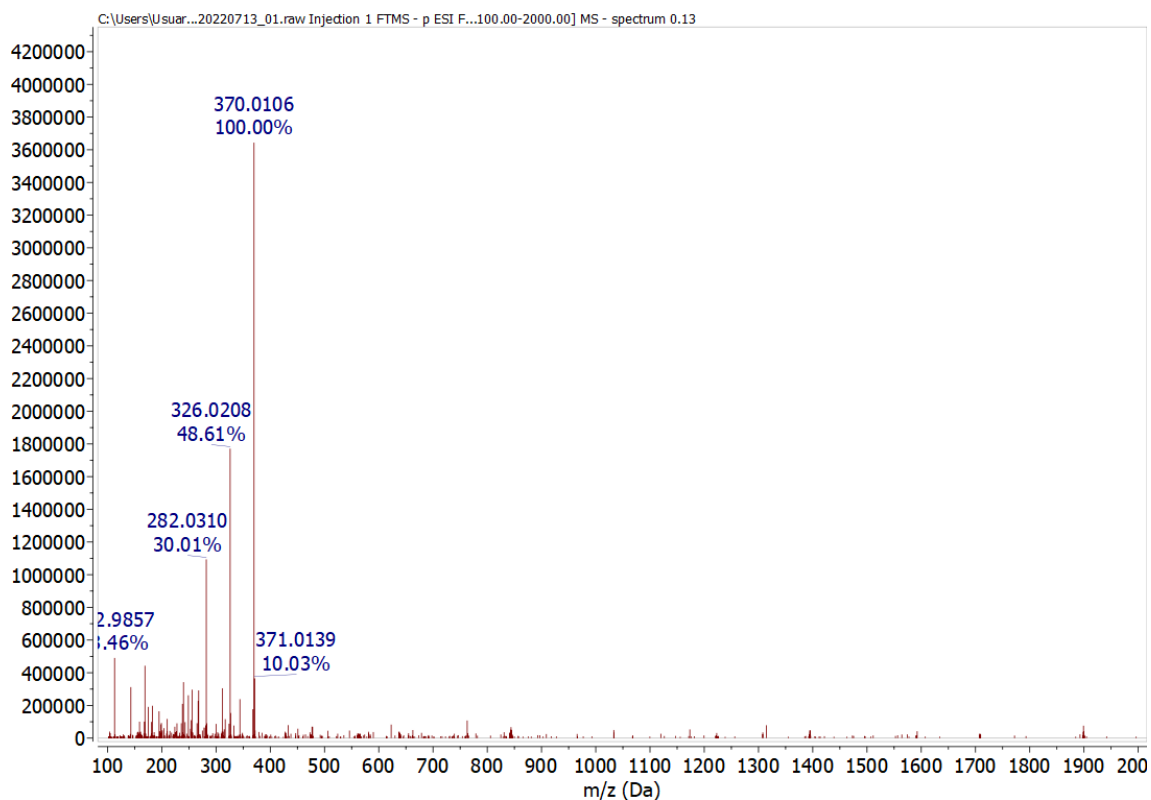

**Figure S22:** Experimental high resolution mass spectrum (ESI<sup>+</sup>) of [Fe(CBuDTA)]<sup>-</sup>.

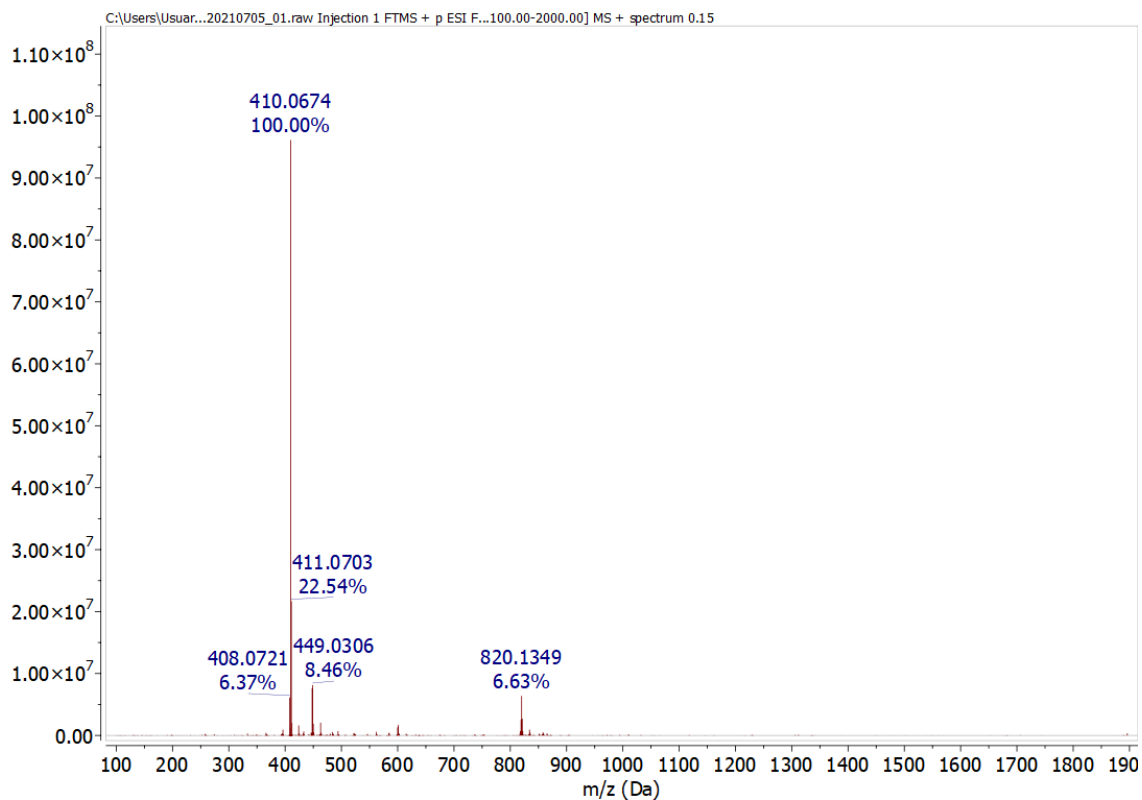

**Figure S23:** Experimental high resolution mass spectrum (ESI<sup>+</sup>) of [Fe(CBuDEDPA)]<sup>+</sup>.

**Table S1:** Crystal Data and Structure Refinement Details. Parameter [Fe(CBuDEDPA)](PF<sub>6</sub>).

|                                                        |                                                                                     |
|--------------------------------------------------------|-------------------------------------------------------------------------------------|
| <b>Empirical formula</b>                               | [Fe(C <sub>18</sub> H <sub>20</sub> N <sub>4</sub> O <sub>5</sub> )]PF <sub>6</sub> |
| <b>Molecular weight MW</b>                             | 573.20                                                                              |
| <b>Crystal system</b>                                  | Monoclinic                                                                          |
| <b>Space group</b>                                     | P2 <sub>1</sub> /n                                                                  |
| <b>a/Å</b>                                             | 12.4135(5)                                                                          |
| <b>b/Å, β/°</b>                                        | 10.9733(4), 93.6190(10)                                                             |
| <b>c/Å</b>                                             | 15.5664(6)                                                                          |
| <b>Volume (Å<sup>3</sup>)</b>                          | 2116.18(14)                                                                         |
| <b>Z</b>                                               | 4                                                                                   |
| <b>ρ<sub>calc</sub> (g/cm<sup>3</sup>)</b>             | 1.799                                                                               |
| <b>μ (mm<sup>-1</sup>)</b>                             | 0.883                                                                               |
| <b>θ range</b>                                         | 2.48°-28.31°                                                                        |
| <b>R<sub>int</sub></b>                                 | 0.0310                                                                              |
| <b>Measured reflections</b>                            | 43559                                                                               |
| <b>Independent reflections / unique (I &gt; 2σ(I))</b> | 5254 / 4893                                                                         |
| <b>Goodness-of-fit on F<sup>2</sup></b>                | 1.092                                                                               |
| <b>R<sub>1</sub></b>                                   | 0.0298                                                                              |
| <b>wR<sub>2</sub> (all data)</b>                       | 0.0710                                                                              |
| <b>Larg. diff. peak and hole (eÅ<sup>-3</sup>)</b>     | 0.45 and -0.35                                                                      |

## Cyclic voltammetry

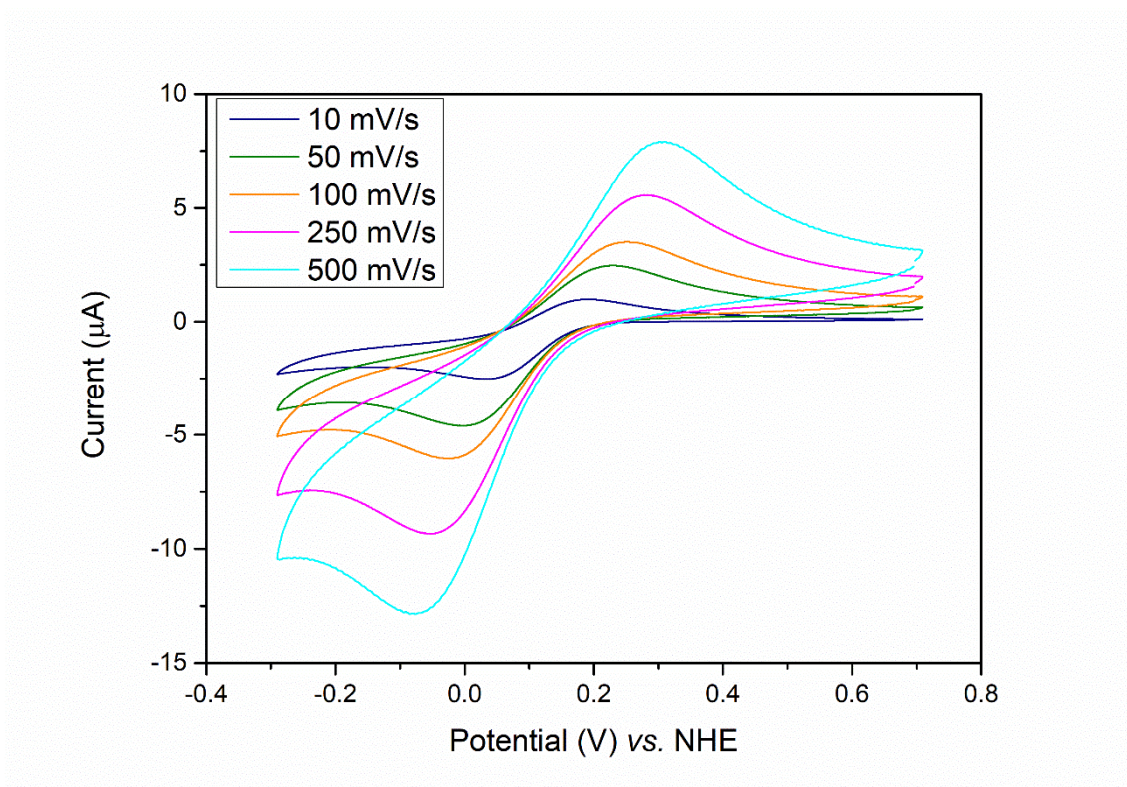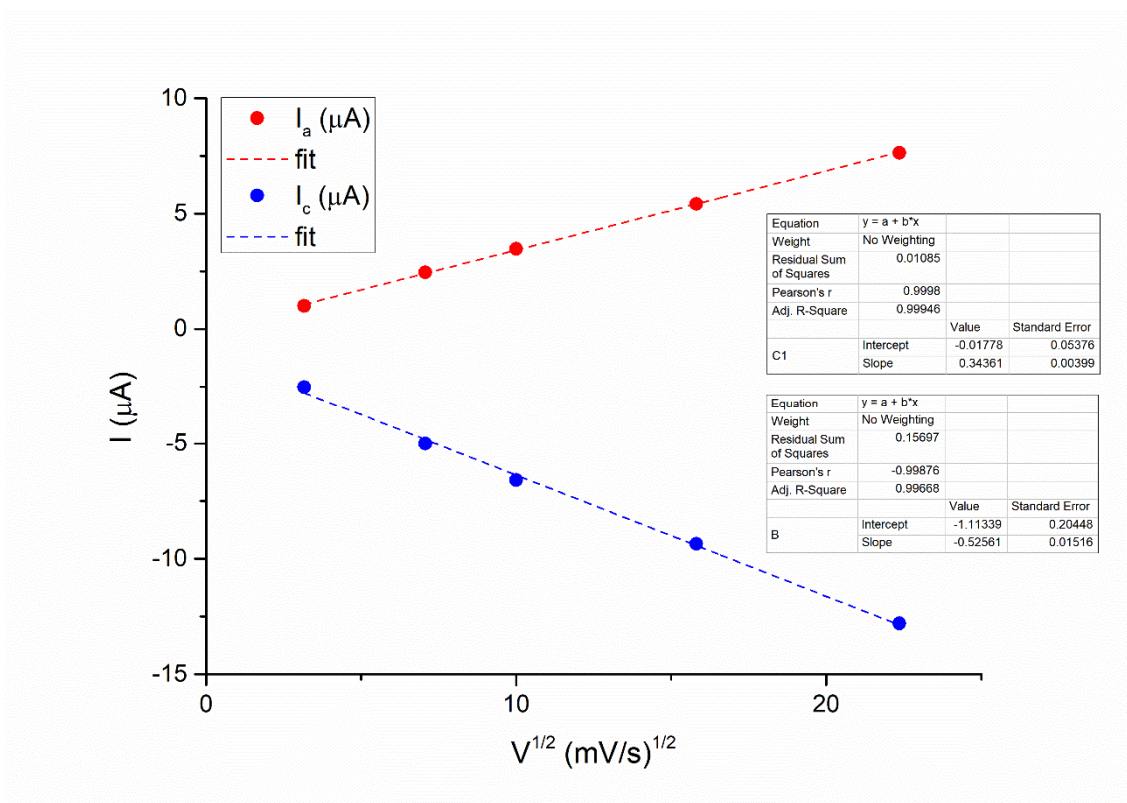

**Figure S24:** Cyclic voltammogram of  $[\text{Fe}(\text{EDTA})]^-$  complex in aqueous solution in 0.15 M NaCl (2.6 mM, pH= 5.5), recorded at 10, 50, 100, 250, and 500  $\text{mV}\cdot\text{s}^{-1}$  (top); and plots of the linear dependence of anodic and cathodic peak currents with the square root of the scan rate (bottom).



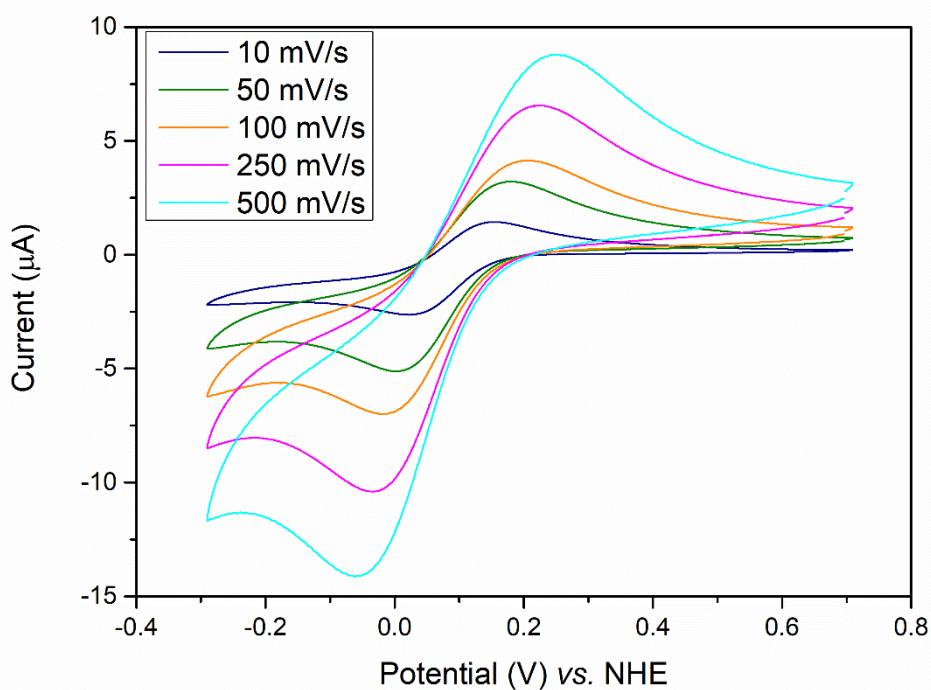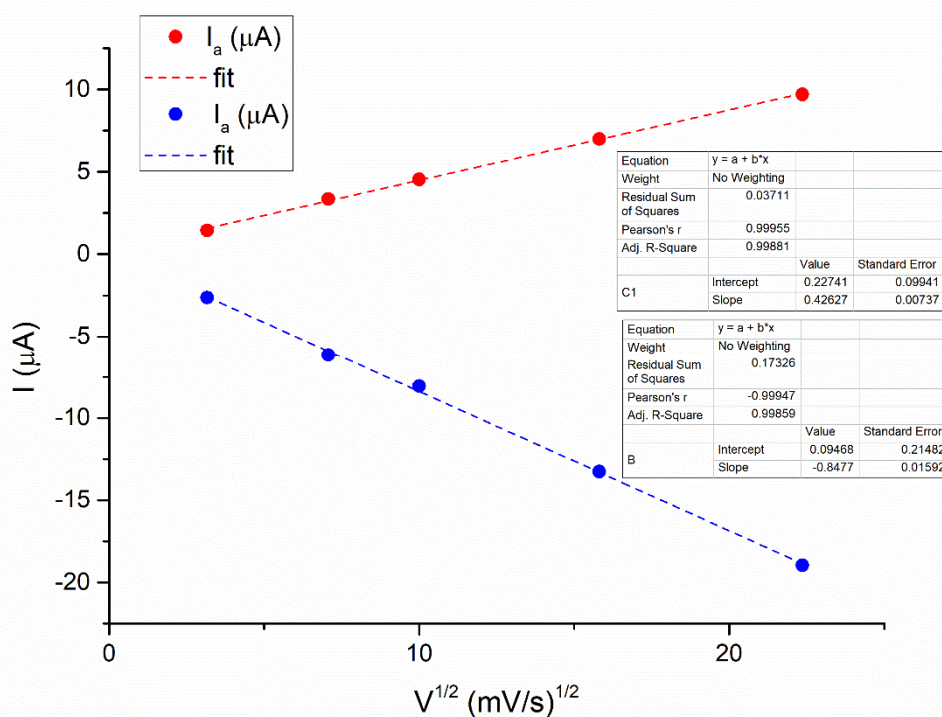

**Figure S25:** Cyclic voltammogram of  $[\text{Fe}(t\text{-CDTA})]^-$  complex in aqueous solution in 0.15 M NaCl (2.6 mM, pH= 5.3), recorded at 10, 50, 100, 250, and 500  $\text{mV}\cdot\text{s}^{-1}$  (top); and plots of the linear dependence of anodic and cathodic peak currents with the square root of the scan rate (bottom).

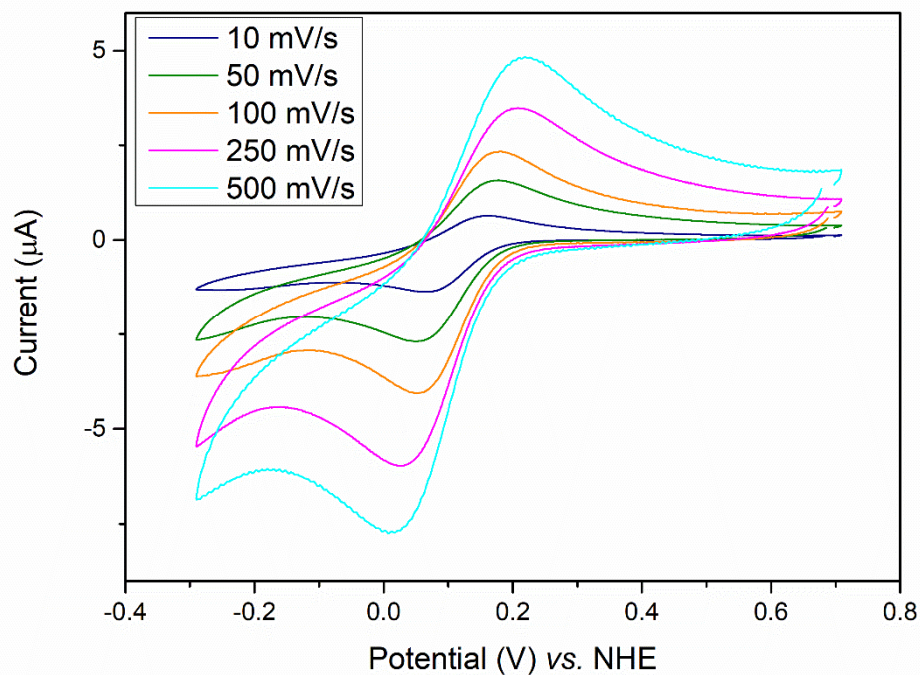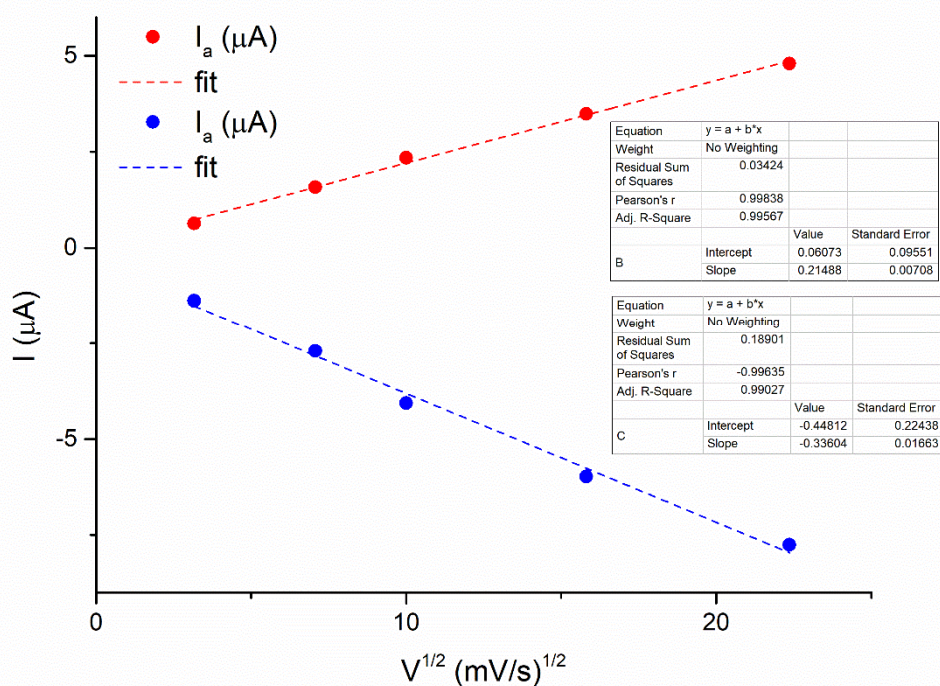

**Figure S26:** Cyclic voltammogram of  $[\text{Fe}(\text{c-CDTA})]^-$  complex in aqueous solution in 0.15 M NaCl (2.0 mM, pH= 6.8), recorded at 10, 50, 100, 250, and 500  $\text{mV}\cdot\text{s}^{-1}$  (top); and plots of the linear dependence of anodic and cathodic peak currents with the square root of the scan rate (bottom).



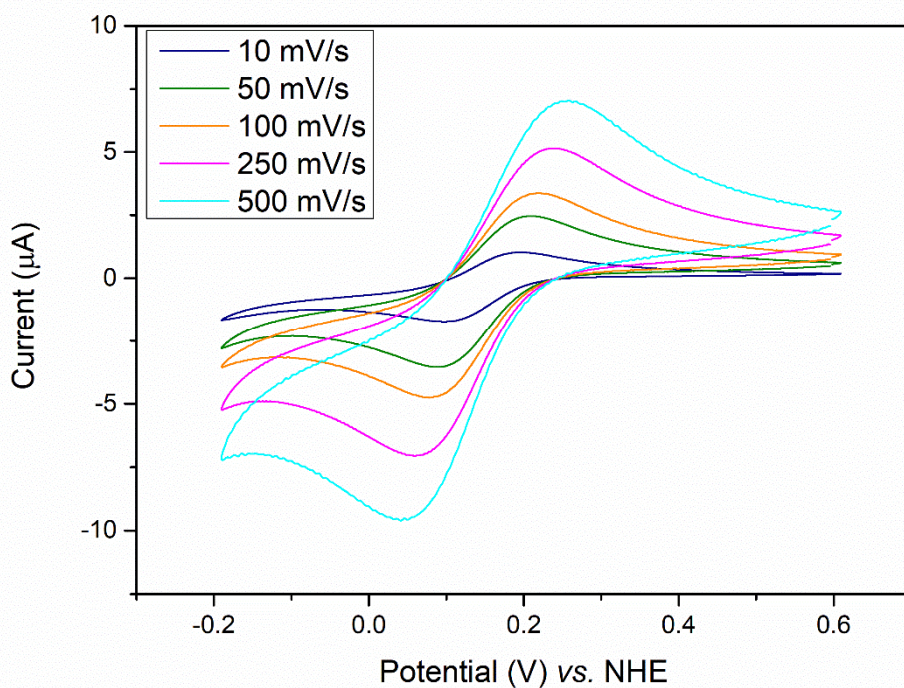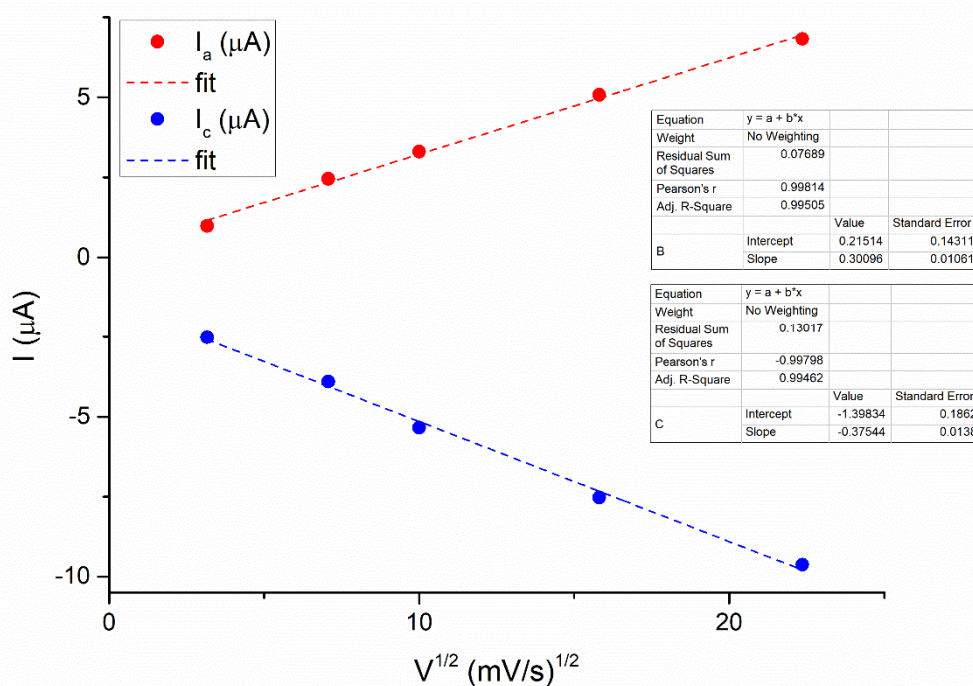

**Figure S27:** Cyclic voltammogram of  $[\text{Fe}(\text{CpDTA})]^-$  complex in aqueous solution in 0.15 M NaCl (2.0 mM, pH= 5.7), recorded at 10, 50, 100, 250, and 500  $\text{mV}\cdot\text{s}^{-1}$  (top); and plots of the linear dependence of anodic and cathodic peak currents with the square root of the scan rate (bottom).

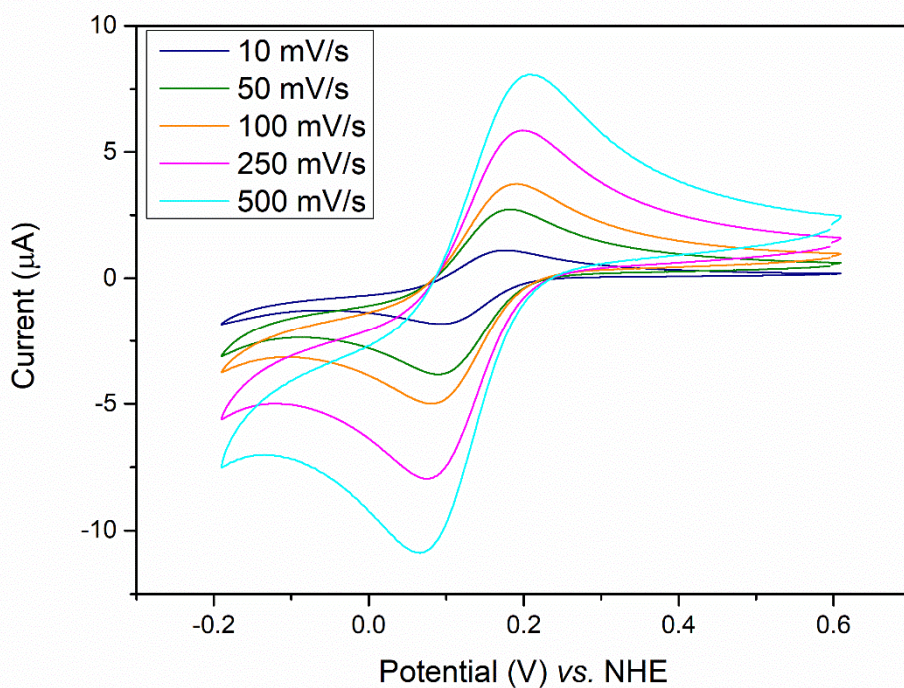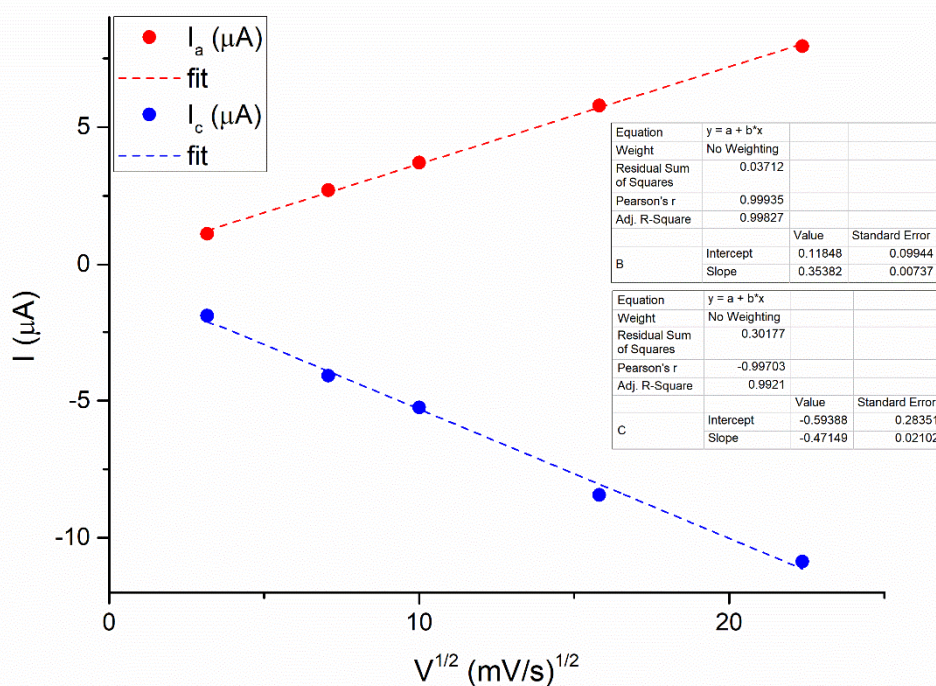

**Figure S28:** Cyclic voltammogram of  $[\text{Fe}(\text{PhDTA})]^-$  complex in aqueous solution in 0.15 M NaCl (2 mM, pH= 5.6), recorded at 10, 50, 100, 250, and 500  $\text{mV}\cdot\text{s}^{-1}$  (top); and plots of the linear dependence of anodic and cathodic peak currents with the square root of the scan rate (bottom).



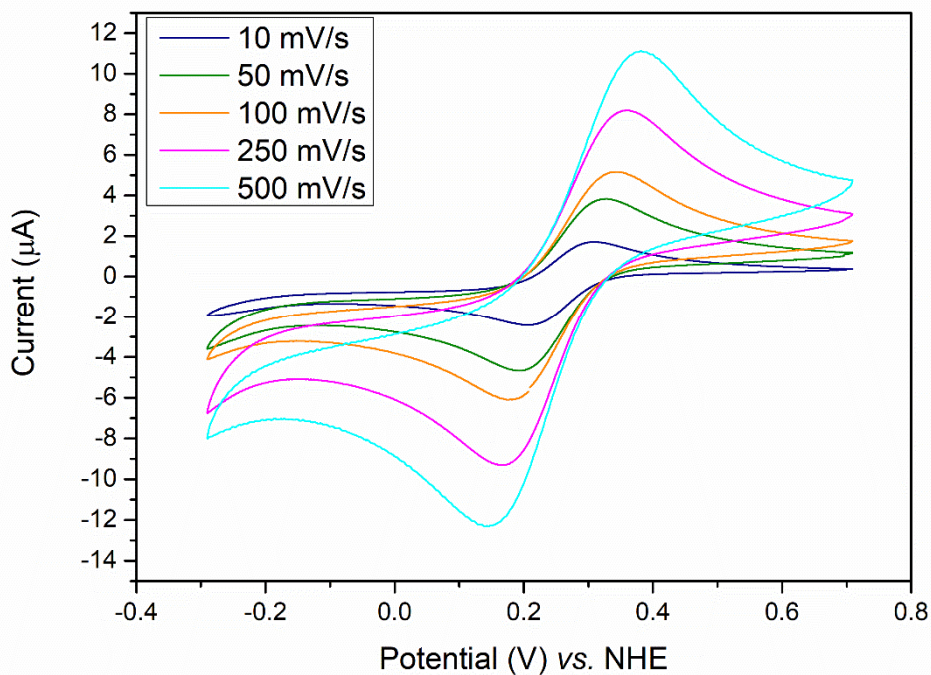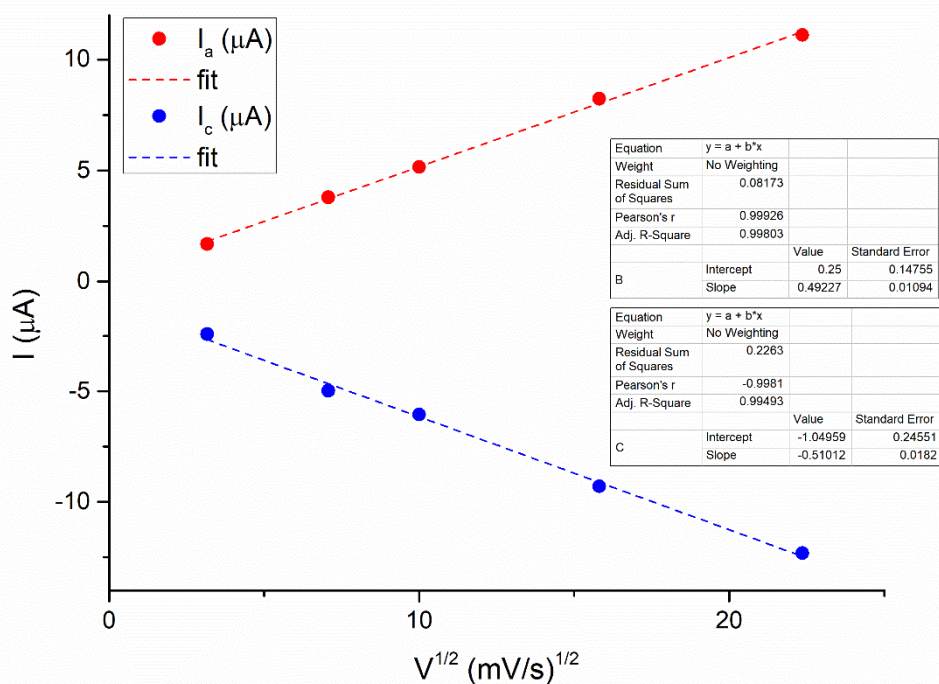

**Figure S29:** Cyclic voltammogram of  $[\text{Fe}(\text{PDTA})]^-$  complex in aqueous solution in 0.15 M NaCl (3.0 mM, pH= 5.9), recorded at 10, 50, 100, 250, and 500  $\text{mV}\cdot\text{s}^{-1}$  (top); and plots of the linear dependence of anodic and cathodic peak currents with the square root of the scan rate (bottom).

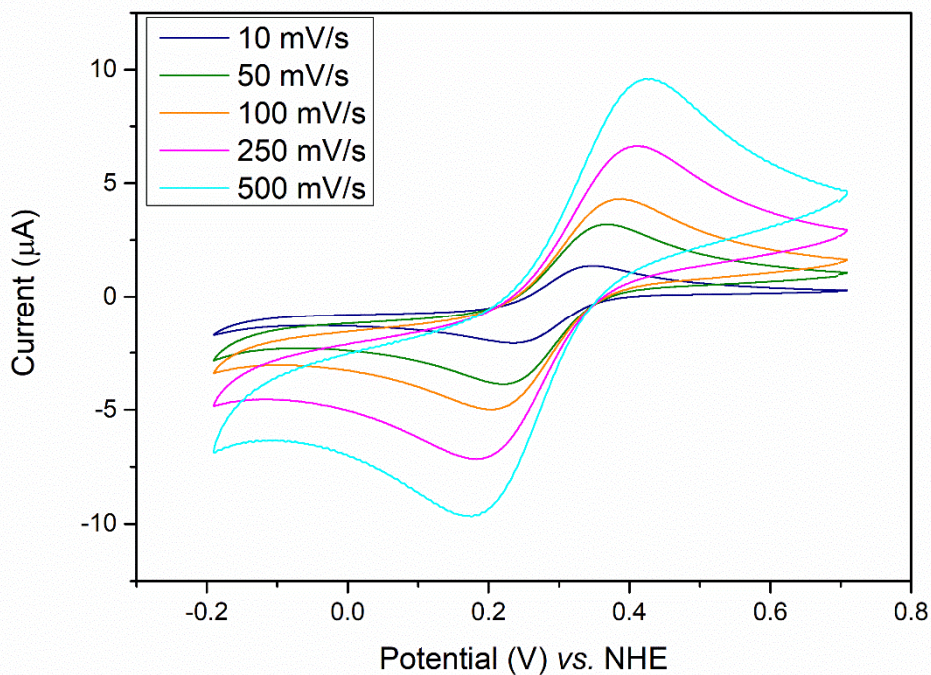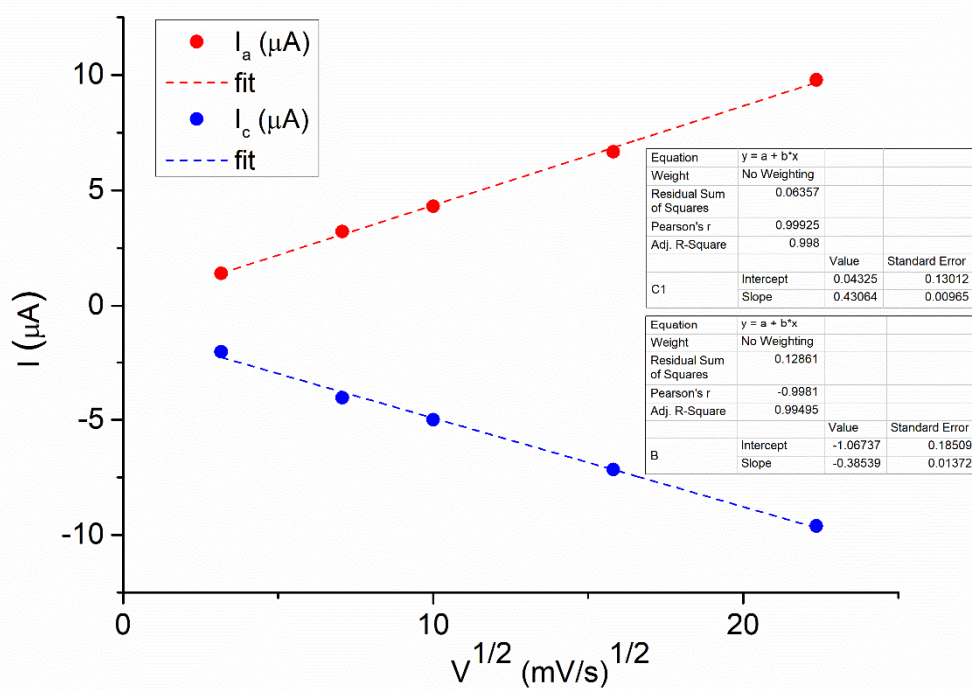

**Figure S30:** Cyclic voltammogram of  $[\text{Fe}(\text{CBuDTA})]^-$  complex in aqueous solution in 0.15 M NaCl (2.3 mM, pH= 5.7), recorded at 10, 50, 100, 250, and 500  $\text{mV}\cdot\text{s}^{-1}$  (top); and plots of the linear dependence of anodic and cathodic peak currents with the square root of the scan rate (bottom).



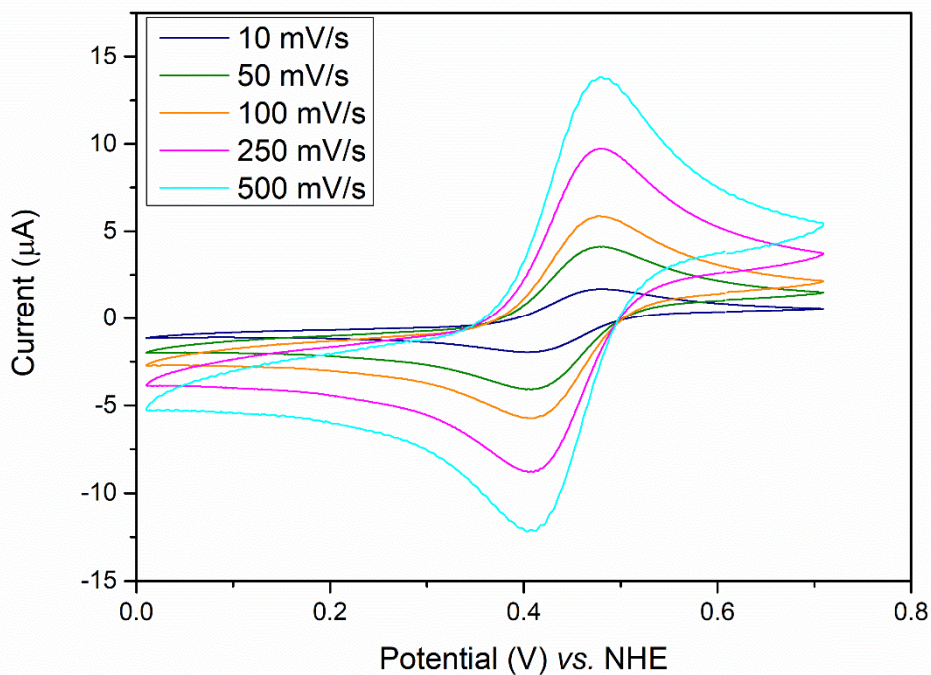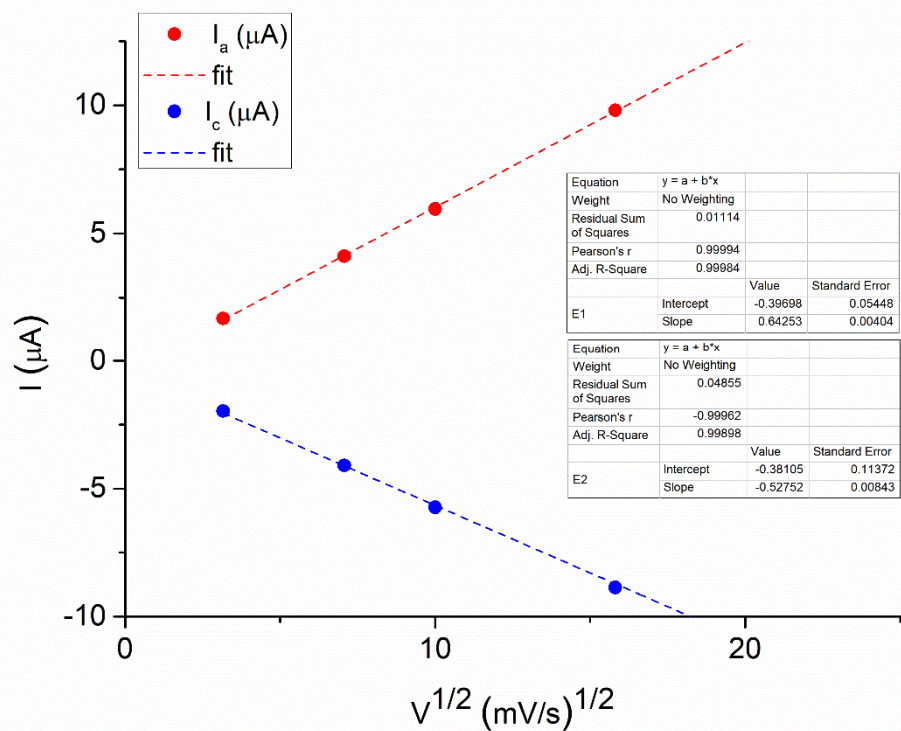

**Figure S31:** Cyclic voltammogram of  $[\text{Fe}(\text{CBuDEDPA})]^+$  complex in aqueous solution in 0.15 M NaCl (1.5 mM, pH= 5.1), recorded at 10, 50, 100, 250, and 500  $\text{mV}\cdot\text{s}^{-1}$  (top); and plots of the linear dependence of anodic and cathodic peak currents with the square root of the scan rate (bottom).

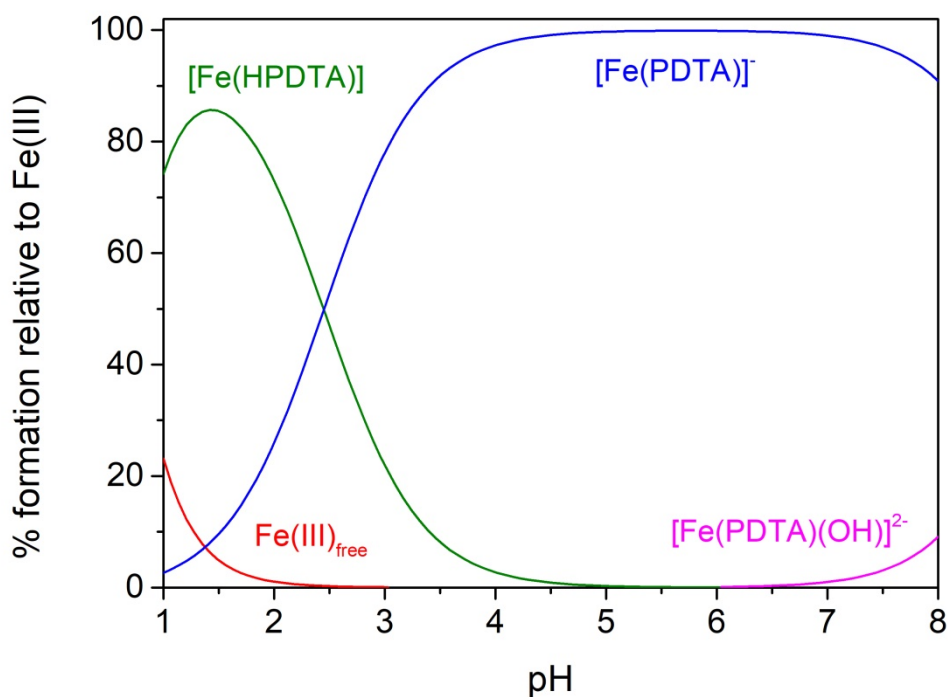

**Figure S32:** Speciation diagram calculated for the Fe(III)-PDTA<sup>4-</sup> using the equilibrium data reported in the literature.<sup>1</sup>

**Table S2:** Optimized Cartesian coordinates (Å) of the [Fe(EDTA)(δ)(H<sub>2</sub>O)]<sup>-</sup>·5H<sub>2</sub>O system obtained with DFT calculations (0 Imaginary Frequencies).

| Center Number | Atomic Number | Atomic Type | Coordinates (Angstroms) |           |           |
|---------------|---------------|-------------|-------------------------|-----------|-----------|
|               |               |             | X                       | Y         | Z         |
| 1             | 8             |             | 2.260386                | -0.720986 | 1.364607  |
| 2             | 8             |             | 3.749283                | -2.381962 | 1.257905  |
| 3             | 8             |             | 2.699927                | 3.027797  | -1.480850 |
| 4             | 8             |             | 1.002364                | 1.892593  | -0.576985 |
| 5             | 8             |             | -0.272768               | -2.128111 | 0.635356  |
| 6             | 8             |             | -1.988091               | -3.529867 | 0.377144  |
| 7             | 8             |             | -1.694301               | 1.014213  | 0.143891  |
| 8             | 8             |             | -2.736900               | 2.265112  | -1.379147 |
| 9             | 7             |             | -0.827094               | -0.766069 | -1.631576 |
| 10            | 7             |             | 2.057891                | -0.496393 | -1.283552 |
| 11            | 6             |             | 0.128328                | -1.424204 | -2.524820 |
| 12            | 1             |             | 0.306078                | -2.429024 | -2.124202 |
| 13            | 6             |             | 1.445053                | -0.666274 | -2.603167 |
| 14            | 1             |             | 1.270045                | 0.334653  | -3.014102 |
| 15            | 6             |             | 2.712607                | -1.691415 | -0.771657 |
| 16            | 1             |             | 2.064953                | -2.560203 | -0.934401 |
| 17            | 1             |             | 3.675199                | -1.891724 | -1.265565 |
| 18            | 6             |             | 2.943438                | -1.602963 | 0.745886  |
| 19            | 6             |             | 2.936161                | 0.668182  | -1.260442 |
| 20            | 1             |             | 3.591291                | 0.606205  | -0.384418 |
| 21            | 1             |             | 3.575407                | 0.724569  | -2.152972 |
| 22            | 6             |             | 2.156569                | 1.984499  | -1.113633 |
| 23            | 6             |             | -1.824685               | -1.706111 | -1.138329 |
| 24            | 1             |             | -2.701659               | -1.155845 | -0.779452 |
| 25            | 1             |             | -2.173492               | -2.393026 | -1.923495 |
| 26            | 6             |             | -1.315330               | -2.531780 | 0.053325  |



|    |    |           |           |           |
|----|----|-----------|-----------|-----------|
| 27 | 6  | -1.426654 | 0.445665  | -2.166806 |
| 28 | 1  | -0.660697 | 1.053810  | -2.658816 |
| 29 | 1  | -2.217997 | 0.242460  | -2.904025 |
| 30 | 6  | -2.006828 | 1.314834  | -1.043825 |
| 31 | 8  | 0.077022  | 0.976794  | 2.362594  |
| 32 | 1  | 0.813332  | 0.891751  | 2.996708  |
| 33 | 1  | -0.081237 | 1.926332  | 2.168212  |
| 34 | 8  | -0.177393 | 3.518512  | 1.337854  |
| 35 | 8  | 2.350214  | 0.298596  | 3.821716  |
| 36 | 1  | 0.194793  | 3.097577  | 0.537631  |
| 37 | 1  | -1.118260 | 3.699833  | 1.150147  |
| 38 | 1  | 2.259482  | -0.327626 | 4.543945  |
| 39 | 1  | 2.463389  | -0.219185 | 2.988964  |
| 40 | 26 | 0.348452  | -0.025323 | 0.355241  |
| 41 | 8  | -3.321749 | -0.447054 | 1.957513  |
| 42 | 1  | -2.779214 | 0.074710  | 1.343276  |
| 43 | 1  | -3.788655 | -1.123553 | 1.441017  |
| 44 | 8  | -4.546015 | -2.659609 | 0.602375  |
| 45 | 8  | -2.887960 | 3.942846  | 0.740950  |
| 46 | 1  | -2.914235 | 3.324891  | -0.030163 |
| 47 | 1  | -3.165168 | 4.805736  | 0.423509  |
| 48 | 1  | -5.040118 | -2.637915 | -0.220708 |
| 49 | 1  | -3.692077 | -3.112322 | 0.424353  |
| 50 | 1  | -0.288612 | -1.549707 | -3.536680 |
| 51 | 1  | 2.128005  | -1.180352 | -3.297719 |

-----

Zero-point correction= 0.395443 (Hartree/Particle)

Thermal correction to Energy= 0.429967

Thermal correction to Enthalpy= 0.430911

Thermal correction to Gibbs Free Energy= 0.328274

Sum of electronic and zero-point Energies= -2822.171259

Sum of electronic and thermal Energies= -2822.136735

Sum of electronic and thermal Enthalpies= -2822.135791

Sum of electronic and thermal Free Energies= -2822.238428

**Table S3:** Optimized Cartesian coordinates (Å) of the [Fe(EDTA)(λ)(H<sub>2</sub>O)]·5H<sub>2</sub>O system obtained with DFT calculations (0 Imaginary Frequencies).

| Center Number | Atomic Number | Atomic Type | Coordinates (Angstroms) |           |           |
|---------------|---------------|-------------|-------------------------|-----------|-----------|
|               |               |             | X                       | Y         | Z         |
| 1             | 8             |             | 2.025312                | 0.170235  | 1.499139  |
| 2             | 8             |             | 3.934835                | -0.705839 | 2.215335  |
| 3             | 8             |             | 2.273762                | 2.321420  | -2.527490 |
| 4             | 8             |             | 0.870876                | 1.509959  | -1.011310 |
| 5             | 8             |             | -0.091661               | -1.666672 | 0.995398  |
| 6             | 8             |             | -1.389577               | -3.460508 | 0.956583  |
| 7             | 8             |             | -1.669150               | 0.625846  | 0.001190  |
| 8             | 8             |             | -3.323395               | 1.163769  | -1.381370 |
| 9             | 7             |             | -0.551892               | -1.054510 | -1.644222 |
| 10            | 7             |             | 2.174180                | -0.901860 | -0.875139 |
| 11            | 6             |             | 0.510663                | -1.410592 | -2.588380 |
| 12            | 1             |             | 0.172870                | -2.164704 | -3.304481 |
| 13            | 6             |             | 1.714562                | -1.914195 | -1.833701 |
| 14            | 1             |             | 2.512044                | -2.187205 | -2.530097 |
| 15            | 6             |             | 3.026926                | -1.492594 | 0.154341  |
| 16            | 1             |             | 2.609105                | -2.454462 | 0.451812  |
| 17            | 1             |             | 4.046124                | -1.663022 | -0.197376 |
| 18            | 6             |             | 3.035354                | -0.618599 | 1.395081  |
| 19            | 6             |             | 2.830906                | 0.237419  | -1.533504 |
| 20            | 1             |             | 3.654899                | 0.586318  | -0.910236 |
| 21            | 1             |             | 3.262417                | -0.052399 | -2.492462 |
| 22            | 6             |             | 1.935928                | 1.457554  | -1.740364 |
| 23            | 6             |             | -1.211750               | -2.226403 | -1.054364 |
| 24            | 1             |             | -2.294595               | -2.109896 | -1.104855 |
| 25            | 1             |             | -0.978936               | -3.133766 | -1.614219 |

|    |    |           |           |           |
|----|----|-----------|-----------|-----------|
| 26 | 6  | -0.879311 | -2.486694 | 0.411152  |
| 27 | 6  | -1.518440 | -0.132603 | -2.229322 |
| 28 | 1  | -0.988399 | 0.620101  | -2.812911 |
| 29 | 1  | -2.228898 | -0.631732 | -2.891617 |
| 30 | 6  | -2.253201 | 0.609001  | -1.130900 |
| 31 | 8  | -0.174015 | 1.478969  | 1.817585  |
| 32 | 1  | 0.527145  | 1.734414  | 2.443825  |
| 33 | 1  | -0.481644 | 2.302274  | 1.377823  |
| 34 | 8  | -0.667146 | 3.642116  | 0.272781  |
| 35 | 8  | 1.972415  | 2.000717  | 3.512764  |
| 36 | 1  | -0.245351 | 3.150377  | -0.442779 |
| 37 | 1  | -1.622350 | 3.658216  | 0.072303  |
| 38 | 1  | 1.865163  | 1.633089  | 4.390385  |
| 39 | 1  | 2.279885  | 1.265070  | 2.954654  |
| 40 | 26 | 0.364084  | 0.093494  | 0.260504  |
| 41 | 8  | -3.406172 | -0.101247 | 2.161926  |
| 42 | 1  | -2.803352 | 0.223875  | 1.479770  |
| 43 | 1  | -3.650969 | -0.993020 | 1.875342  |
| 44 | 8  | -4.054190 | -2.796678 | 1.426149  |
| 45 | 8  | -3.405111 | 3.557608  | -0.086141 |
| 46 | 1  | -3.481602 | 2.675094  | -0.502857 |
| 47 | 1  | -3.767893 | 4.174038  | -0.722253 |
| 48 | 1  | -4.575818 | -2.922105 | 0.633504  |
| 49 | 1  | -3.178858 | -3.165362 | 1.224682  |
| 50 | 1  | 0.769522  | -0.521420 | -3.161830 |
| 51 | 1  | 1.453209  | -2.811350 | -1.274258 |

|                                              |                             |
|----------------------------------------------|-----------------------------|
| Zero-point correction=                       | 0.394748 (Hartree/Particle) |
| Thermal correction to Energy=                | 0.429716                    |
| Thermal correction to Enthalpy=              | 0.430660                    |
| Thermal correction to Gibbs Free Energy=     | 0.325829                    |
| Sum of electronic and zero-point Energies=   | -2822.171634                |
| Sum of electronic and thermal Energies=      | -2822.136666                |
| Sum of electronic and thermal Enthalpies=    | -2822.135722                |
| Sum of electronic and thermal Free Energies= | -2822.240552                |

**Table S4:** Optimized Cartesian coordinates (Å) of the  $[\text{Fe}(t\text{-CDTA})(\delta)(\text{H}_2\text{O})]^- \cdot 5\text{H}_2\text{O}$  system obtained with DFT calculations (0 Imaginary Frequencies).

| Center Number | Atomic Number | Coordinates (Angstroms) |           |           |
|---------------|---------------|-------------------------|-----------|-----------|
|               |               | X                       | Y         | Z         |
| 1             | 8             | -0.186053               | -2.236125 | 1.438499  |
| 2             | 8             | -1.672776               | -2.907648 | 2.949202  |
| 3             | 8             | -0.872021               | -2.780407 | -2.942684 |
| 4             | 8             | 0.225805                | -1.441606 | -1.549676 |
| 5             | 8             | 0.393909                | 0.348983  | 2.018451  |
| 6             | 8             | 0.799173                | 2.260032  | 3.070034  |
| 7             | 8             | 1.841685                | 0.548593  | -0.693879 |
| 8             | 8             | 2.174905                | 1.757605  | -2.529111 |
| 9             | 7             | -0.508539               | 1.497323  | -0.203773 |
| 10            | 7             | -1.899571               | -0.959689 | -0.026463 |
| 11            | 6             | -1.983956               | 1.509025  | -0.084569 |
| 12            | 1             | -2.190845               | 1.546890  | 0.988163  |
| 13            | 6             | -2.572412               | 0.215599  | -0.629643 |
| 14            | 1             | -2.344941               | 0.167342  | -1.697698 |
| 15            | 6             | -2.365582               | -1.316043 | 1.315097  |
| 16            | 1             | -2.443756               | -0.419833 | 1.930497  |
| 17            | 1             | -3.340650               | -1.804353 | 1.305338  |
| 18            | 6             | -1.352766               | -2.238889 | 1.981375  |
| 19            | 6             | -1.970109               | -2.108134 | -0.939509 |
| 20            | 1             | -1.904360               | -3.035405 | -0.371960 |
| 21            | 1             | -2.910771               | -2.135840 | -1.488863 |
| 22            | 6             | -0.804453               | -2.125443 | -1.918994 |
| 23            | 6             | 0.100325                | 2.373449  | 0.803407  |
| 24            | 1             | 1.030914                | 2.794869  | 0.424736  |

|    |    |           |           |           |
|----|----|-----------|-----------|-----------|
| 25 | 1  | -0.543052 | 3.217023  | 1.053501  |
| 26 | 6  | 0.453818  | 1.622484  | 2.078679  |
| 27 | 6  | 0.009947  | 1.787687  | -1.540770 |
| 28 | 1  | -0.545013 | 1.223073  | -2.289316 |
| 29 | 1  | -0.056563 | 2.845035  | -1.800249 |
| 30 | 6  | 1.462397  | 1.342889  | -1.617193 |
| 31 | 8  | 2.257840  | -1.596132 | 0.611613  |
| 32 | 1  | 2.237972  | -2.432225 | 1.112688  |
| 33 | 1  | 2.674704  | -1.778927 | -0.259766 |
| 34 | 8  | 2.958651  | -2.122285 | -1.951337 |
| 35 | 8  | 1.848351  | -3.875050 | 2.126735  |
| 36 | 1  | 2.030056  | -1.905356 | -2.119205 |
| 37 | 1  | 3.465348  | -1.365738 | -2.301454 |
| 38 | 1  | 2.144013  | -3.784489 | 3.032925  |
| 39 | 1  | 0.971448  | -3.450388 | 2.090040  |
| 40 | 26 | 0.378230  | -0.615393 | 0.273873  |
| 41 | 8  | 4.075961  | 1.530419  | 0.822138  |
| 42 | 1  | 3.357395  | 1.133489  | 0.312828  |
| 43 | 1  | 3.691664  | 2.304304  | 1.258741  |
| 44 | 8  | 2.996195  | 3.745222  | 2.284603  |
| 45 | 8  | 4.336835  | 0.112259  | -2.855443 |
| 46 | 1  | 3.615156  | 0.763396  | -2.734077 |
| 47 | 1  | 4.524146  | 0.106938  | -3.794078 |
| 48 | 1  | 2.741609  | 4.544268  | 1.823352  |
| 49 | 1  | 2.171998  | 3.371342  | 2.641094  |
| 50 | 6  | -4.094919 | 0.200229  | -0.472915 |
| 51 | 6  | -2.642579 | 2.725965  | -0.738967 |
| 52 | 1  | -2.413639 | 2.729742  | -1.807082 |
| 53 | 1  | -2.225946 | 3.642689  | -0.320544 |
| 54 | 6  | -4.156715 | 2.700946  | -0.567311 |
| 55 | 1  | -4.593093 | 3.569505  | -1.060577 |
| 56 | 1  | -4.409053 | 2.776448  | 0.494178  |
| 57 | 6  | -4.735508 | 1.412765  | -1.138092 |
| 58 | 1  | -5.815124 | 1.379232  | -0.991772 |
| 59 | 1  | -4.558248 | 1.378536  | -2.216764 |
| 60 | 1  | -4.501124 | -0.721921 | -0.889394 |
| 61 | 1  | -4.350058 | 0.211089  | 0.588944  |

-----

Zero-point correction= 0.490144 (Hartree/Particle)

Thermal correction to Energy= 0.528063

Thermal correction to Enthalpy= 0.529008

Thermal correction to Gibbs Free Energy= 0.419060

Sum of electronic and zero-point Energies= -2978.147442

Sum of electronic and thermal Energies= -2978.109522

Sum of electronic and thermal Enthalpies= -2978.108578

Sum of electronic and thermal Free Energies= -2978.218526

**Table S5:** Optimized Cartesian coordinates (Å) of the  $[\text{Fe}(t\text{-CDTA})(\lambda)(\text{H}_2\text{O})]^- \cdot 5\text{H}_2\text{O}$  system obtained with DFT calculations (0 Imaginary Frequencies).

| Center Number | Atomic Number | Coordinates (Angstroms) |           |           |
|---------------|---------------|-------------------------|-----------|-----------|
|               |               | X                       | Y         | Z         |
| 1             | 8             | -0.077061               | 2.509234  | -1.044476 |
| 2             | 8             | -1.447457               | 3.746546  | -2.275408 |
| 3             | 8             | -1.292191               | 1.767531  | 3.296168  |
| 4             | 8             | 0.084848                | 1.087243  | 1.695130  |
| 5             | 8             | 0.329110                | -0.129453 | -1.980184 |
| 6             | 8             | 0.652157                | -1.993808 | -3.130780 |
| 7             | 8             | 1.951603                | -0.629504 | 0.373811  |
| 8             | 8             | 2.646992                | -2.256705 | 1.716646  |
| 9             | 7             | -0.526417               | -1.486265 | 0.276462  |
| 10            | 7             | -1.955823               | 0.911774  | -0.163020 |
| 11            | 6             | -1.939957               | -1.377184 | 0.706406  |
| 12            | 6             | -2.649544               | -0.401158 | -0.220184 |
| 13            | 6             | -2.292253               | 1.729804  | -1.328688 |

|    |    |           |           |           |
|----|----|-----------|-----------|-----------|
| 14 | 1  | -2.334746 | 1.090466  | -2.210926 |
| 15 | 1  | -3.258631 | 2.226582  | -1.228963 |
| 16 | 6  | -1.214218 | 2.766535  | -1.586699 |
| 17 | 6  | -2.156683 | 1.664494  | 1.086886  |
| 18 | 1  | -2.158520 | 2.730153  | 0.855994  |
| 19 | 1  | -3.114780 | 1.453773  | 1.554027  |
| 20 | 6  | -1.061254 | 1.487802  | 2.134621  |
| 21 | 6  | -0.321025 | -2.214276 | -0.985204 |
| 22 | 1  | 0.310433  | -3.088266 | -0.828590 |
| 23 | 1  | -1.261419 | -2.597087 | -1.378969 |
| 24 | 6  | 0.283735  | -1.399253 | -2.122828 |
| 25 | 6  | 0.312447  | -2.026845 | 1.342146  |
| 26 | 1  | 0.003620  | -1.593096 | 2.293662  |
| 27 | 1  | 0.238078  | -3.112260 | 1.429637  |
| 28 | 6  | 1.759346  | -1.631337 | 1.135473  |
| 29 | 8  | 2.264436  | 1.784965  | -0.233129 |
| 30 | 1  | 2.217273  | 2.726356  | -0.477803 |
| 31 | 1  | 2.645287  | 1.739545  | 0.671134  |
| 32 | 8  | 2.850423  | 1.668187  | 2.407306  |
| 33 | 8  | 1.865048  | 4.417460  | -1.051146 |
| 34 | 1  | 1.941693  | 1.362759  | 2.521353  |
| 35 | 1  | 3.423932  | 0.891000  | 2.547635  |
| 36 | 1  | 2.243922  | 4.607211  | -1.909825 |
| 37 | 1  | 1.018504  | 3.971699  | -1.229578 |
| 38 | 26 | 0.403083  | 0.685933  | -0.204421 |
| 39 | 8  | 4.115271  | -1.097259 | -1.437346 |
| 40 | 1  | 3.445155  | -0.838178 | -0.790118 |
| 41 | 1  | 3.769968  | -1.913780 | -1.826616 |
| 42 | 8  | 2.980594  | -3.426150 | -2.668428 |
| 43 | 8  | 4.549490  | -0.507767 | 2.571260  |
| 44 | 1  | 3.955114  | -1.198909 | 2.214011  |
| 45 | 1  | 4.779597  | -0.798252 | 3.453798  |
| 46 | 1  | 2.819178  | -4.165238 | -2.082053 |
| 47 | 1  | 2.105597  | -3.054444 | -2.870100 |
| 48 | 1  | -1.913168 | -0.931958 | 1.703602  |
| 49 | 1  | -2.506721 | -0.753317 | -1.244259 |
| 50 | 6  | -4.160019 | -0.329372 | 0.018904  |
| 51 | 1  | -4.375817 | 0.145620  | 0.976576  |
| 52 | 1  | -4.616076 | 0.289428  | -0.754061 |
| 53 | 6  | -2.651344 | -2.727637 | 0.839983  |
| 54 | 1  | -2.543739 | -3.306101 | -0.078968 |
| 55 | 1  | -2.170516 | -3.302950 | 1.631534  |
| 56 | 6  | -4.791092 | -1.716289 | 0.041098  |
| 57 | 1  | -5.862734 | -1.622343 | 0.216972  |
| 58 | 1  | -4.668470 | -2.201683 | -0.931592 |
| 59 | 6  | -4.139771 | -2.566997 | 1.122507  |
| 60 | 1  | -4.287160 | -2.092306 | 2.096885  |
| 61 | 1  | -4.605640 | -3.551134 | 1.174561  |

-----

|                                              |                             |
|----------------------------------------------|-----------------------------|
| Zero-point correction=                       | 0.489298 (Hartree/Particle) |
| Thermal correction to Energy=                | 0.527759                    |
| Thermal correction to Enthalpy=              | 0.528704                    |
| Thermal correction to Gibbs Free Energy=     | 0.416769                    |
| Sum of electronic and zero-point Energies=   | -2978.143913                |
| Sum of electronic and thermal Energies=      | -2978.105452                |
| Sum of electronic and thermal Enthalpies=    | -2978.104507                |
| Sum of electronic and thermal Free Energies= | -2978.216442                |

**Table S6:** Optimized Cartesian coordinates (Å) of the  $[\text{Fe}(\text{c-CDTA})(\delta)(\text{H}_2\text{O})] \cdot 5\text{H}_2\text{O}$  system obtained with DFT calculations (0 Imaginary Frequencies).

| Center Number | Atomic Number | Coordinates (Angstroms) |           |          |
|---------------|---------------|-------------------------|-----------|----------|
|               |               | X                       | Y         | Z        |
| 1             | 8             | -0.626513               | -1.677041 | 1.798476 |
| 2             | 8             | -2.455947               | -1.960899 | 3.028433 |

|    |    |           |           |           |
|----|----|-----------|-----------|-----------|
| 3  | 8  | -0.433807 | -3.502788 | -2.272742 |
| 4  | 8  | 0.459984  | -1.838031 | -1.103061 |
| 5  | 8  | 0.031558  | 0.979446  | 1.706985  |
| 6  | 8  | 0.321114  | 3.126872  | 2.189506  |
| 7  | 8  | 2.026537  | 0.261699  | -0.573401 |
| 8  | 8  | 2.805249  | 0.790207  | -2.587868 |
| 9  | 7  | -0.281897 | 1.385570  | -0.898310 |
| 10 | 7  | -1.897561 | -0.866491 | -0.313889 |
| 11 | 6  | -1.737424 | 1.488514  | -1.199122 |
| 12 | 6  | -2.304753 | 0.075727  | -1.390485 |
| 13 | 1  | -1.819089 | -0.331427 | -2.277578 |
| 14 | 6  | -2.668272 | -0.845920 | 0.931519  |
| 15 | 1  | -2.815691 | 0.175188  | 1.268524  |
| 16 | 1  | -3.648341 | -1.312438 | 0.824008  |
| 17 | 6  | -1.887348 | -1.559650 | 2.027482  |
| 18 | 6  | -1.864851 | -2.235025 | -0.855876 |
| 19 | 1  | -2.003970 | -2.953599 | -0.049211 |
| 20 | 1  | -2.666078 | -2.407236 | -1.573767 |
| 21 | 6  | -0.525402 | -2.573047 | -1.492166 |
| 22 | 6  | 0.255484  | 2.495464  | -0.104118 |
| 23 | 1  | 1.314804  | 2.615177  | -0.325423 |
| 24 | 1  | -0.208826 | 3.450866  | -0.334516 |
| 25 | 6  | 0.184260  | 2.207660  | 1.387040  |
| 26 | 6  | 0.509885  | 1.214695  | -2.119723 |
| 27 | 1  | 0.052722  | 0.462442  | -2.760791 |
| 28 | 1  | 0.580505  | 2.142269  | -2.692370 |
| 29 | 6  | 1.901658  | 0.720860  | -1.757161 |
| 30 | 8  | 1.975383  | -1.333742 | 1.404246  |
| 31 | 1  | 1.784326  | -1.969786 | 2.117993  |
| 32 | 1  | 2.544579  | -1.789053 | 0.744736  |
| 33 | 8  | 3.138930  | -2.673712 | -0.646036 |
| 34 | 8  | 1.084274  | -3.037273 | 3.394784  |
| 35 | 1  | 2.287748  | -2.500763 | -1.074200 |
| 36 | 1  | 3.772994  | -2.084064 | -1.095072 |
| 37 | 1  | 1.174553  | -2.675911 | 4.276866  |
| 38 | 1  | 0.267748  | -2.648374 | 3.031525  |
| 39 | 26 | 0.289663  | -0.486185 | 0.376058  |
| 40 | 8  | 3.925718  | 1.695138  | 1.051215  |
| 41 | 1  | 3.307854  | 1.160800  | 0.535715  |
| 42 | 1  | 3.517410  | 2.568735  | 1.137354  |
| 43 | 8  | 2.748625  | 4.268881  | 1.494514  |
| 44 | 8  | 4.858497  | -0.881318 | -1.893890 |
| 45 | 1  | 4.176412  | -0.226202 | -2.149415 |
| 46 | 1  | 5.228869  | -1.201919 | -2.716191 |
| 47 | 1  | 2.662758  | 4.876363  | 0.759824  |
| 48 | 1  | 1.840149  | 4.045317  | 1.759962  |
| 49 | 1  | -1.836351 | 1.977436  | -2.175263 |
| 50 | 6  | -2.551918 | 2.350008  | -0.231287 |
| 51 | 1  | -2.167793 | 3.366901  | -0.227113 |
| 52 | 1  | -2.479296 | 1.990096  | 0.794959  |
| 53 | 6  | -3.807342 | 0.118922  | -1.706102 |
| 54 | 1  | -3.895858 | 0.484979  | -2.731543 |
| 55 | 1  | -4.212128 | -0.893593 | -1.713595 |
| 56 | 6  | -4.638280 | 1.023807  | -0.799582 |
| 57 | 1  | -5.642467 | 1.108081  | -1.216203 |
| 58 | 1  | -4.757744 | 0.585090  | 0.190608  |
| 59 | 6  | -4.011564 | 2.405361  | -0.678096 |
| 60 | 1  | -4.059173 | 2.909246  | -1.647935 |
| 61 | 1  | -4.577279 | 3.018896  | 0.022751  |

-----

|                                              |                             |
|----------------------------------------------|-----------------------------|
| Zero-point correction=                       | 0.490986 (Hartree/Particle) |
| Thermal correction to Energy=                | 0.528626                    |
| Thermal correction to Enthalpy=              | 0.529571                    |
| Thermal correction to Gibbs Free Energy=     | 0.421096                    |
| Sum of electronic and zero-point Energies=   | -2978.133845                |
| Sum of electronic and thermal Energies=      | -2978.096205                |
| Sum of electronic and thermal Enthalpies=    | -2978.095260                |
| Sum of electronic and thermal Free Energies= | -2978.203735                |

**Table S7:** Optimized Cartesian coordinates (Å) of the  $[\text{Fe}(\text{c-CDTA})(\lambda)(\text{H}_2\text{O})]^- \cdot 5\text{H}_2\text{O}$  system obtained with DFT calculations (0 Imaginary Frequencies).

| Center Number | Atomic Number | Atomic Type | Coordinates (Angstroms) |           |           |
|---------------|---------------|-------------|-------------------------|-----------|-----------|
|               |               |             | X                       | Y         | Z         |
| 1             | 8             |             | -0.394635               | 2.379369  | 1.241319  |
| 2             | 8             |             | 0.820456                | 3.911431  | 2.289152  |
| 3             | 8             |             | -0.059487               | 2.508010  | -3.250606 |
| 4             | 8             |             | -0.782958               | 1.261264  | -1.563443 |
| 5             | 8             |             | 0.236872                | -0.332547 | 1.824398  |
| 6             | 8             |             | 1.028643                | -2.188241 | 2.735869  |
| 7             | 8             |             | -1.766548               | -1.071124 | -0.224962 |
| 8             | 8             |             | -2.311941               | -2.628907 | -1.712400 |
| 9             | 7             |             | 0.793484                | -1.158885 | -0.749818 |
| 10            | 7             |             | 1.613156                | 1.494993  | -0.195718 |
| 11            | 6             |             | 1.988481                | -0.595836 | -1.424660 |
| 12            | 6             |             | 2.653292                | 0.515710  | -0.613661 |
| 13            | 6             |             | 1.951448                | 2.244106  | 1.014398  |
| 14            | 1             |             | 2.272523                | 1.554556  | 1.791629  |
| 15            | 1             |             | 2.747636                | 2.972764  | 0.850353  |
| 16            | 6             |             | 0.719362                | 2.931688  | 1.568221  |
| 17            | 6             |             | 1.296273                | 2.417773  | -1.302352 |
| 18            | 1             |             | 1.067317                | 3.403398  | -0.895676 |
| 19            | 1             |             | 2.149130                | 2.546306  | -1.969101 |
| 20            | 6             |             | 0.074909                | 2.039383  | -2.135848 |
| 21            | 6             |             | 1.016241                | -2.080059 | 0.374072  |
| 22            | 1             |             | 0.341862                | -2.932586 | 0.285464  |
| 23            | 1             |             | 2.015886                | -2.498021 | 0.375281  |
| 24            | 6             |             | 0.752348                | -1.499402 | 1.757730  |
| 25            | 6             |             | -0.094760               | -1.776654 | -1.735401 |
| 26            | 1             |             | -0.136716               | -1.151718 | -2.627137 |
| 27            | 1             |             | 0.238010                | -2.770963 | -2.039085 |
| 28            | 6             |             | -1.506277               | -1.856012 | -1.194102 |
| 29            | 8             |             | -2.551730               | 1.023439  | 0.884952  |
| 30            | 1             |             | -2.699637               | 1.904986  | 1.271054  |
| 31            | 1             |             | -3.113445               | 0.969067  | 0.081250  |
| 32            | 8             |             | -3.702555               | 1.083958  | -1.567687 |
| 33            | 8             |             | -2.723050               | 3.582467  | 1.988809  |
| 34            | 1             |             | -2.804072               | 1.083133  | -1.920477 |
| 35            | 1             |             | -4.073791               | 0.200596  | -1.753297 |
| 36            | 1             |             | -2.885821               | 3.589772  | 2.932362  |
| 37            | 1             |             | -1.768304               | 3.424323  | 1.888079  |
| 38            | 26            |             | -0.526381               | 0.565916  | 0.259454  |
| 39            | 8             |             | -2.884408               | -2.485482 | 2.008015  |
| 40            | 1             |             | -2.572557               | -1.961787 | 1.258130  |
| 41            | 1             |             | -2.180183               | -3.126483 | 2.181769  |
| 42            | 8             |             | -0.773148               | -4.303358 | 2.697309  |
| 43            | 8             |             | -4.761819               | -1.452952 | -1.843185 |
| 44            | 1             |             | -3.935376               | -1.968242 | -1.744018 |
| 45            | 1             |             | -5.103707               | -1.680316 | -2.707867 |
| 46            | 1             |             | -0.511543               | -4.975742 | 2.068378  |
| 47            | 1             |             | -0.023745               | -3.687860 | 2.752756  |
| 48            | 1             |             | 1.570731                | -0.115892 | -2.309542 |
| 49            | 6             |             | 3.031609                | -1.600373 | -1.948595 |
| 50            | 1             |             | 2.524019                | -2.465320 | -2.376412 |
| 51            | 6             |             | 3.586613                | -0.006332 | 0.477192  |
| 52            | 1             |             | 3.057390                | -0.569067 | 1.246829  |
| 53            | 6             |             | 4.107551                | -2.043312 | -0.954662 |
| 54            | 1             |             | 3.728161                | -2.798595 | -0.266029 |
| 55            | 1             |             | 4.909403                | -2.532429 | -1.509047 |
| 56            | 1             |             | 3.315411                | 1.030779  | -1.318644 |
| 57            | 6             |             | 4.673204                | -0.869173 | -0.165673 |
| 58            | 1             |             | 4.072794                | 0.828909  | 0.977010  |
| 59            | 1             |             | 5.264053                | -0.236378 | -0.834261 |

|                                              |   |          |              |                    |
|----------------------------------------------|---|----------|--------------|--------------------|
| 60                                           | 1 | 5.352934 | -1.228808    | 0.606536           |
| 61                                           | 1 | 3.529756 | -1.102620    | -2.783602          |
| -----                                        |   |          |              |                    |
| Zero-point correction=                       |   |          | 0.489949     | (Hartree/Particle) |
| Thermal correction to Energy=                |   |          | 0.528191     |                    |
| Thermal correction to Enthalpy=              |   |          | 0.529135     |                    |
| Thermal correction to Gibbs Free Energy=     |   |          | 0.418318     |                    |
| Sum of electronic and zero-point Energies=   |   |          | -2978.132192 |                    |
| Sum of electronic and thermal Energies=      |   |          | -2978.093950 |                    |
| Sum of electronic and thermal Enthalpies=    |   |          | -2978.093005 |                    |
| Sum of electronic and thermal Free Energies= |   |          | -2978.203823 |                    |

**Table S8:** Optimized Cartesian coordinates (Å) of the [Fe(CpDTA)( $\delta$ )(H<sub>2</sub>O)]<sup>-</sup>·5H<sub>2</sub>O system obtained with DFT calculations (0 Imaginary Frequencies).

| Center Number | Atomic Number | Coordinates (Angstroms) |           |           |
|---------------|---------------|-------------------------|-----------|-----------|
|               |               | X                       | Y         | Z         |
| 1             | 8             | -0.989101               | -1.834115 | 1.568315  |
| 2             | 8             | -2.690666               | -1.951264 | 2.993990  |
| 3             | 8             | -1.546916               | -2.644907 | -2.811489 |
| 4             | 8             | -0.222197               | -1.496496 | -1.446478 |
| 5             | 8             | 0.271923                | 0.535237  | 1.955073  |
| 6             | 8             | 1.128478                | 2.353613  | 2.893306  |
| 7             | 8             | 1.832187                | 0.071874  | -0.645750 |
| 8             | 8             | 2.589927                | 0.974638  | -2.529769 |
| 9             | 7             | -0.168814               | 1.678759  | -0.400561 |
| 10            | 7             | -2.225184               | -0.345517 | -0.146576 |
| 11            | 6             | -1.591863               | 2.028010  | -0.370905 |
| 12            | 1             | -1.838069               | 2.183522  | 0.682158  |
| 13            | 6             | -2.451532               | 0.897221  | -0.893935 |
| 14            | 1             | -2.143030               | 0.686360  | -1.920414 |
| 15            | 6             | -2.852489               | -0.422778 | 1.169885  |
| 16            | 1             | -2.739272               | 0.526056  | 1.693955  |
| 17            | 1             | -3.918212               | -0.650056 | 1.115919  |
| 18            | 6             | -2.151085               | -1.490061 | 2.002937  |
| 19            | 6             | -2.550635               | -1.512324 | -0.972190 |
| 20            | 1             | -2.774826               | -2.366094 | -0.333679 |
| 21            | 1             | -3.428286               | -1.334598 | -1.594423 |
| 22            | 6             | -1.372521               | -1.928191 | -1.843474 |
| 23            | 6             | 0.589298                | 2.455307  | 0.582364  |
| 24            | 1             | 1.615613                | 2.594988  | 0.243943  |
| 25            | 1             | 0.168081                | 3.451566  | 0.722436  |
| 26            | 6             | 0.670044                | 1.748179  | 1.928207  |
| 27            | 6             | 0.472618                | 1.695591  | -1.711293 |
| 28            | 1             | -0.179898               | 1.242771  | -2.457077 |
| 29            | 1             | 0.718411                | 2.703307  | -2.050311 |
| 30            | 6             | 1.742020                | 0.857229  | -1.647336 |
| 31            | 8             | 1.575112                | -1.980086 | 0.855395  |
| 32            | 1             | 1.304183                | -2.722075 | 1.427913  |
| 33            | 1             | 1.967598                | -2.356662 | 0.035479  |
| 34            | 8             | 2.237184                | -2.918472 | -1.590123 |
| 35            | 8             | 0.488795                | -3.873946 | 2.542696  |
| 36            | 1             | 1.412170                | -2.481582 | -1.846909 |
| 37            | 1             | 2.947048                | -2.360263 | -1.959758 |
| 38            | 1             | 0.765649                | -3.772701 | 3.453694  |
| 39            | 1             | -0.235454               | -3.234295 | 2.411949  |
| 40            | 26            | 0.067649                | -0.569115 | 0.310293  |
| 41            | 8             | 4.176454                | 0.558449  | 0.952154  |
| 42            | 1             | 3.400696                | 0.329843  | 0.423806  |
| 43            | 1             | 4.003773                | 1.444412  | 1.302227  |
| 44            | 8             | 3.687655                | 3.109187  | 2.157725  |
| 45            | 8             | 4.211496                | -1.230530 | -2.566330 |
| 46            | 1             | 3.696067                | -0.397641 | -2.549255 |
| 47            | 1             | 4.434215                | -1.376967 | -3.485629 |
| 48            | 1             | 3.685869                | 3.895969  | 1.612696  |

|    |   |           |          |           |
|----|---|-----------|----------|-----------|
| 49 | 1 | 2.776205  | 3.009619 | 2.482215  |
| 50 | 6 | -3.853691 | 1.506093 | -0.930602 |
| 51 | 1 | -4.317233 | 1.436708 | 0.052807  |
| 52 | 1 | -4.507552 | 1.000963 | -1.637753 |
| 53 | 6 | -2.084460 | 3.234565 | -1.167715 |
| 54 | 6 | -3.606176 | 2.990185 | -1.298282 |
| 55 | 1 | -4.164196 | 3.641951 | -0.629530 |
| 56 | 1 | -3.941089 | 3.207433 | -2.310014 |
| 57 | 1 | -1.849208 | 4.181012 | -0.686064 |
| 58 | 1 | -1.619969 | 3.241150 | -2.153727 |

|                                              |                             |
|----------------------------------------------|-----------------------------|
| Zero-point correction=                       | 0.460375 (Hartree/Particle) |
| Thermal correction to Energy=                | 0.497639                    |
| Thermal correction to Enthalpy=              | 0.498583                    |
| Thermal correction to Gibbs Free Energy=     | 0.388979                    |
| Sum of electronic and zero-point Energies=   | -2938.848257                |
| Sum of electronic and thermal Energies=      | -2938.810993                |
| Sum of electronic and thermal Enthalpies=    | -2938.810049                |
| Sum of electronic and thermal Free Energies= | -2938.919653                |

**Table S9:** Optimized Cartesian coordinates (Å) of the  $[\text{Fe}(\text{CpDTA})(\lambda)(\text{H}_2\text{O})]^- \cdot 5\text{H}_2\text{O}$  system obtained with DFT calculations (0 Imaginary Frequencies).

| Center Number | Atomic Number | Atomic Type | Coordinates (Angstroms) |           |           |
|---------------|---------------|-------------|-------------------------|-----------|-----------|
|               |               |             | X                       | Y         | Z         |
| 1             | 8             |             | 0.775798                | 2.199134  | 1.247032  |
| 2             | 8             |             | 2.447337                | 3.027728  | 2.447758  |
| 3             | 8             |             | 1.606662                | 1.809298  | -3.218207 |
| 4             | 8             |             | 0.210539                | 1.194884  | -1.608000 |
| 5             | 8             |             | -0.103343               | -0.419818 | 1.888926  |
| 6             | 8             |             | -0.624670               | -2.310500 | 2.915194  |
| 7             | 8             |             | -1.942725               | -0.251890 | -0.383796 |
| 8             | 8             |             | -3.058315               | -1.514581 | -1.831064 |
| 9             | 7             |             | 0.261484                | -1.650411 | -0.550499 |
| 10            | 7             |             | 2.248054                | 0.390536  | 0.057031  |
| 11            | 6             |             | 1.642358                | -1.719993 | -1.033774 |
| 12            | 6             |             | 2.560398                | -1.038994 | -0.039703 |
| 13            | 6             |             | 2.808457                | 0.988314  | 1.265619  |
| 14            | 1             |             | 2.762612                | 0.260261  | 2.076107  |
| 15            | 1             |             | 3.851742                | 1.283513  | 1.142383  |
| 16            | 6             |             | 1.978303                | 2.182218  | 1.702776  |
| 17            | 6             |             | 2.563594                | 1.180671  | -1.139396 |
| 18            | 1             |             | 2.885268                | 2.176022  | -0.831896 |
| 19            | 1             |             | 3.388458                | 0.756107  | -1.708709 |
| 20            | 6             |             | 1.389910                | 1.409811  | -2.089632 |
| 21            | 6             |             | -0.027734               | -2.467902 | 0.630800  |
| 22            | 1             |             | -0.906480               | -3.088527 | 0.457251  |
| 23            | 1             |             | 0.785340                | -3.161685 | 0.847282  |
| 24            | 6             |             | -0.281513               | -1.686038 | 1.916302  |
| 25            | 6             |             | -0.715423               | -1.857747 | -1.610011 |
| 26            | 1             |             | -0.355771               | -1.384760 | -2.524435 |
| 27            | 1             |             | -0.889192               | -2.913773 | -1.827367 |
| 28            | 6             |             | -2.022716               | -1.176299 | -1.256655 |
| 29            | 8             |             | -1.698922               | 2.072139  | 0.529319  |
| 30            | 1             |             | -1.441778               | 2.943160  | 0.882408  |
| 31            | 1             |             | -2.119206               | 2.225699  | -0.345867 |
| 32            | 8             |             | -2.406731               | 2.427370  | -2.053528 |
| 33            | 8             |             | -0.730452               | 4.439250  | 1.620457  |
| 34            | 1             |             | -1.592741               | 1.957353  | -2.272982 |
| 35            | 1             |             | -3.141686               | 1.814576  | -2.247226 |
| 36            | 1             |             | -1.022226               | 4.589955  | 2.519924  |
| 37            | 1             |             | 0.019908                | 3.823339  | 1.686639  |
| 38            | 26            |             | -0.127751               | 0.634046  | 0.242969  |
| 39            | 8             |             | -3.990832               | -0.459150 | 1.612032  |
| 40            | 1             |             | -3.335869               | -0.287046 | 0.922016  |



|    |   |           |           |           |
|----|---|-----------|-----------|-----------|
| 41 | 1 | -3.783580 | -1.349683 | 1.930648  |
| 42 | 8 | -3.296190 | -3.038412 | 2.651546  |
| 43 | 8 | -4.542779 | 0.703812  | -2.357960 |
| 44 | 1 | -4.105798 | -0.139263 | -2.118899 |
| 45 | 1 | -4.866093 | 0.581231  | -3.250527 |
| 46 | 1 | -3.387959 | -3.774622 | 2.046813  |
| 47 | 1 | -2.340619 | -2.923208 | 2.781487  |
| 48 | 1 | 1.657716  | -1.145437 | -1.959707 |
| 49 | 1 | 2.351226  | -1.447807 | 0.951176  |
| 50 | 6 | 3.952991  | -1.523229 | -0.432006 |
| 51 | 1 | 4.699708  | -1.335292 | 0.336882  |
| 52 | 1 | 4.291689  | -1.053588 | -1.356418 |
| 53 | 6 | 2.290089  | -3.093139 | -1.313979 |
| 54 | 6 | 3.691237  | -3.017186 | -0.665839 |
| 55 | 1 | 1.704339  | -3.916678 | -0.908951 |
| 56 | 1 | 2.357859  | -3.255751 | -2.387545 |
| 57 | 1 | 3.686151  | -3.536873 | 0.293181  |
| 58 | 1 | 4.459027  | -3.480322 | -1.281277 |

-----

Zero-point correction= 0.459916 (Hartree/Particle)  
Thermal correction to Energy= 0.497395  
Thermal correction to Enthalpy= 0.498339  
Thermal correction to Gibbs Free Energy= 0.388328  
Sum of electronic and zero-point Energies= -2938.847031  
Sum of electronic and thermal Energies= -2938.809552  
Sum of electronic and thermal Enthalpies= -2938.808608  
Sum of electronic and thermal Free Energies= -2938.918619

**Table S10:** Optimized Cartesian coordinates (Å) of the [Fe(PhDTA)(H<sub>2</sub>O)]<sup>-</sup>·5H<sub>2</sub>O system obtained with DFT calculations (0 Imaginary Frequencies).

| Center Number | Atomic Number | Coordinates (Angstroms) |           |           |
|---------------|---------------|-------------------------|-----------|-----------|
|               |               | X                       | Y         | Z         |
| 1             | 8             | -0.389426               | 2.274311  | -1.299831 |
| 2             | 8             | -1.883537               | 3.031418  | -2.759985 |
| 3             | 8             | -1.270698               | 2.197524  | 3.162251  |
| 4             | 8             | 0.017719                | 1.252420  | 1.619567  |
| 5             | 8             | 0.236256                | -0.321410 | -1.969188 |
| 6             | 8             | 0.553327                | -2.206972 | -3.089687 |
| 7             | 8             | 1.876544                | -0.492011 | 0.553845  |
| 8             | 8             | 2.507275                | -1.766158 | 2.262967  |
| 9             | 7             | -0.476689               | -1.558127 | 0.324763  |
| 10            | 7             | -2.055364               | 0.740513  | -0.027313 |
| 11            | 6             | -1.905584               | -1.644118 | 0.492941  |
| 12            | 6             | -2.682985               | -0.512298 | 0.321085  |
| 13            | 6             | -2.514224               | 1.231168  | -1.334312 |
| 14            | 1             | -2.525162               | 0.397499  | -2.035760 |
| 15            | 1             | -3.519071               | 1.653925  | -1.291267 |
| 16            | 6             | -1.545412               | 2.276010  | -1.865140 |
| 17            | 6             | -2.233304               | 1.750790  | 1.032669  |
| 18            | 1             | -2.216495               | 2.743822  | 0.583488  |
| 19            | 1             | -3.187067               | 1.639716  | 1.544795  |
| 20            | 6             | -1.100961               | 1.733821  | 2.051221  |
| 21            | 6             | 0.007043                | -2.388548 | -0.792924 |
| 22            | 1             | 0.948214                | -2.865181 | -0.518275 |
| 23            | 1             | -0.692384               | -3.188234 | -1.030752 |
| 24            | 6             | 0.280503                | -1.594896 | -2.062017 |
| 25            | 6             | 0.236077                | -1.858907 | 1.572245  |
| 26            | 1             | -0.250988               | -1.333841 | 2.392980  |
| 27            | 1             | 0.241229                | -2.924966 | 1.805174  |
| 28            | 6             | 1.661976                | -1.348608 | 1.474098  |
| 29            | 8             | 2.054755                | 1.793689  | -0.507798 |
| 30            | 1             | 1.956478                | 2.667948  | -0.928427 |
| 31            | 1             | 2.460699                | 1.934387  | 0.377588  |
| 32            | 8             | 2.717724                | 2.172006  | 2.078810  |

|    |    |           |           |           |
|----|----|-----------|-----------|-----------|
| 33 | 8  | 1.479263  | 4.177517  | -1.793901 |
| 34 | 1  | 1.830267  | 1.840507  | 2.269925  |
| 35 | 1  | 3.331460  | 1.464261  | 2.353851  |
| 36 | 1  | 1.799047  | 4.210101  | -2.695882 |
| 37 | 1  | 0.641237  | 3.682930  | -1.827855 |
| 38 | 26 | 0.282877  | 0.627209  | -0.243972 |
| 39 | 8  | 4.043375  | -1.183988 | -1.202624 |
| 40 | 1  | 3.348124  | -0.884365 | -0.602508 |
| 41 | 1  | 3.686952  | -1.973780 | -1.634447 |
| 42 | 8  | 3.000163  | -3.442174 | -2.624924 |
| 43 | 8  | 4.447464  | 0.101915  | 2.682277  |
| 44 | 1  | 3.826168  | -0.634906 | 2.508607  |
| 45 | 1  | 4.690835  | 0.022140  | 3.604578  |
| 46 | 1  | 2.896395  | -4.273005 | -2.161232 |
| 47 | 1  | 2.101662  | -3.157279 | -2.859716 |
| 48 | 6  | -4.063935 | -0.594622 | 0.478113  |
| 49 | 6  | -2.510406 | -2.851234 | 0.832690  |
| 50 | 6  | -4.660923 | -1.794533 | 0.810180  |
| 51 | 1  | -5.734296 | -1.846441 | 0.927777  |
| 52 | 6  | -3.879671 | -2.928329 | 0.992229  |
| 53 | 1  | -4.338446 | -3.870755 | 1.256928  |
| 54 | 1  | -1.901736 | -3.734879 | 0.970875  |
| 55 | 1  | -4.674338 | 0.287407  | 0.337981  |

-----  
Zero-point correction= 0.418465 (Hartree/Particle)  
Thermal correction to Energy= 0.455417  
Thermal correction to Enthalpy= 0.456361  
Thermal correction to Gibbs Free Energy= 0.348203  
Sum of electronic and zero-point Energies= -2974.563079  
Sum of electronic and thermal Energies= -2974.526127  
Sum of electronic and thermal Enthalpies= -2974.525183  
Sum of electronic and thermal Free Energies= -2974.633341

**Table S11:** Optimized Cartesian coordinates (Å) of the [Fe(CBuDTA)(H<sub>2</sub>O)]·5H<sub>2</sub>O system obtained with DFT calculations (0 Imaginary Frequencies).

| Center Number | Atomic Number | Coordinates (Angstroms) |           |           |
|---------------|---------------|-------------------------|-----------|-----------|
|               |               | X                       | Y         | Z         |
| 1             | 8             | 2.000571                | 0.434288  | 1.764372  |
| 2             | 8             | 3.613501                | -0.756986 | 2.727504  |
| 3             | 8             | 2.765853                | 2.757642  | -2.012790 |
| 4             | 8             | 1.095669                | 1.773591  | -0.924763 |
| 5             | 8             | -0.581689               | -1.426327 | 1.554053  |
| 6             | 8             | -2.119622               | -2.995240 | 1.867670  |
| 7             | 8             | -1.831221               | 0.673898  | -0.334106 |
| 8             | 8             | -2.917387               | 1.022713  | -2.242468 |
| 9             | 7             | -0.699868               | -1.506980 | -1.089119 |
| 10            | 7             | 2.383807                | -0.513709 | -0.602385 |
| 11            | 6             | 0.401646                | -2.379230 | -1.514396 |
| 12            | 1             | -0.011035               | -3.373212 | -1.681534 |
| 13            | 6             | 2.073332                | -1.317265 | -1.793135 |
| 14            | 1             | 2.823471                | -1.092611 | -2.549975 |
| 15            | 6             | 3.009417                | -1.275908 | 0.476770  |
| 16            | 1             | 2.482689                | -2.219809 | 0.615648  |
| 17            | 1             | 4.056408                | -1.503514 | 0.266323  |
| 18            | 6             | 2.895403                | -0.491601 | 1.779016  |
| 19            | 6             | 3.188080                | 0.656748  | -0.970516 |
| 20            | 1             | 3.771806                | 0.987492  | -0.112207 |
| 21            | 1             | 3.890342                | 0.424774  | -1.771972 |
| 22            | 6             | 2.307343                | 1.834863  | -1.365152 |
| 23            | 6             | -1.716877               | -2.268079 | -0.358055 |
| 24            | 1             | -2.700235               | -1.823036 | -0.507063 |
| 25            | 1             | -1.780502               | -3.297908 | -0.711870 |
| 26            | 6             | -1.461578               | -2.254343 | 1.142192  |
| 27            | 6             | -1.295230               | -0.722622 | -2.168256 |

|    |    |           |           |           |
|----|----|-----------|-----------|-----------|
| 28 | 1  | -0.514106 | -0.284069 | -2.788032 |
| 29 | 1  | -1.935775 | -1.326325 | -2.814638 |
| 30 | 6  | -2.092486 | 0.421451  | -1.557489 |
| 31 | 8  | -0.474173 | 1.718936  | 1.730866  |
| 32 | 1  | 0.106286  | 1.977960  | 2.471245  |
| 33 | 1  | -0.688568 | 2.529005  | 1.215476  |
| 34 | 8  | -0.727250 | 3.795056  | 0.016167  |
| 35 | 8  | 1.371339  | 2.133222  | 3.736411  |
| 36 | 1  | -0.171777 | 3.234638  | -0.545239 |
| 37 | 1  | -1.611694 | 3.769013  | -0.394750 |
| 38 | 1  | 1.102421  | 1.769204  | 4.580202  |
| 39 | 1  | 1.742835  | 1.386618  | 3.230681  |
| 40 | 26 | 0.260516  | 0.226672  | 0.394770  |
| 41 | 8  | -3.961809 | 0.677968  | 1.306388  |
| 42 | 1  | -3.160448 | 0.784254  | 0.777408  |
| 43 | 1  | -4.158504 | -0.270033 | 1.295631  |
| 44 | 8  | -4.553655 | -2.120099 | 1.439793  |
| 45 | 8  | -3.242672 | 3.593264  | -1.148318 |
| 46 | 1  | -3.131047 | 2.708043  | -1.552320 |
| 47 | 1  | -3.381314 | 4.194457  | -1.880111 |
| 48 | 1  | -4.937552 | -2.545226 | 0.673038  |
| 49 | 1  | -3.688452 | -2.543718 | 1.572043  |
| 50 | 6  | 0.998238  | -1.907359 | -2.853431 |
| 51 | 6  | 2.185040  | -2.822275 | -1.486432 |
| 52 | 1  | 2.574338  | -3.054907 | -0.517293 |
| 53 | 1  | 2.510560  | -3.424696 | -2.308640 |
| 54 | 1  | 1.376953  | -2.698009 | -3.466903 |
| 55 | 1  | 0.418327  | -1.158720 | -3.351569 |

```

-----
Zero-point correction=                0.430168 (Hartree/Particle)
Thermal correction to Energy=        0.466168
Thermal correction to Enthalpy=      0.467113
Thermal correction to Gibbs Free Energy= 0.361580
Sum of electronic and zero-point Energies= -2899.529010
Sum of electronic and thermal Energies= -2899.493010
Sum of electronic and thermal Enthalpies= -2899.492066
Sum of electronic and thermal Free Energies= -2899.597598

```

## References

- 1 J. M. Wilson and R. F. Carbonaro, Capillary electrophoresis study of iron(II) and iron(III) polyaminocarboxylate complex speciation, *Environ. Chem.*, 2011, **8**, 295–303.
